# Supplementary material for: Improved Synthesis of 1-O-Acyl-β-d-Glucopyranose Tetraacetates
Source: MDPI journal article supplement (doi:10.3390/molecules22040662), 2017-04-21
Supplement: s1 [file s1]

# Improved synthesis of 1-*O*-Acyl- $\beta$ -D-glucopyranose Tetraacetates

*Yu Chen,<sup>1,2</sup> Huan Lu,<sup>2</sup> Yanyu Chen,<sup>1</sup> Wansheng Yu,<sup>2</sup> Hui Dai,<sup>2</sup> Xianhua Pan<sup>1,2,\*</sup>*

- 1) School of Perfume and Aroma Technology, Shanghai Institute of Technology,  
100 Haiquan Rd., Shanghai, 201418, P.R. China.
- 2) Shanghai Research Institute of Fragrance and Flavor Industry, 480 Nanning Rd.,  
Shanghai, 200232, P.R. China.

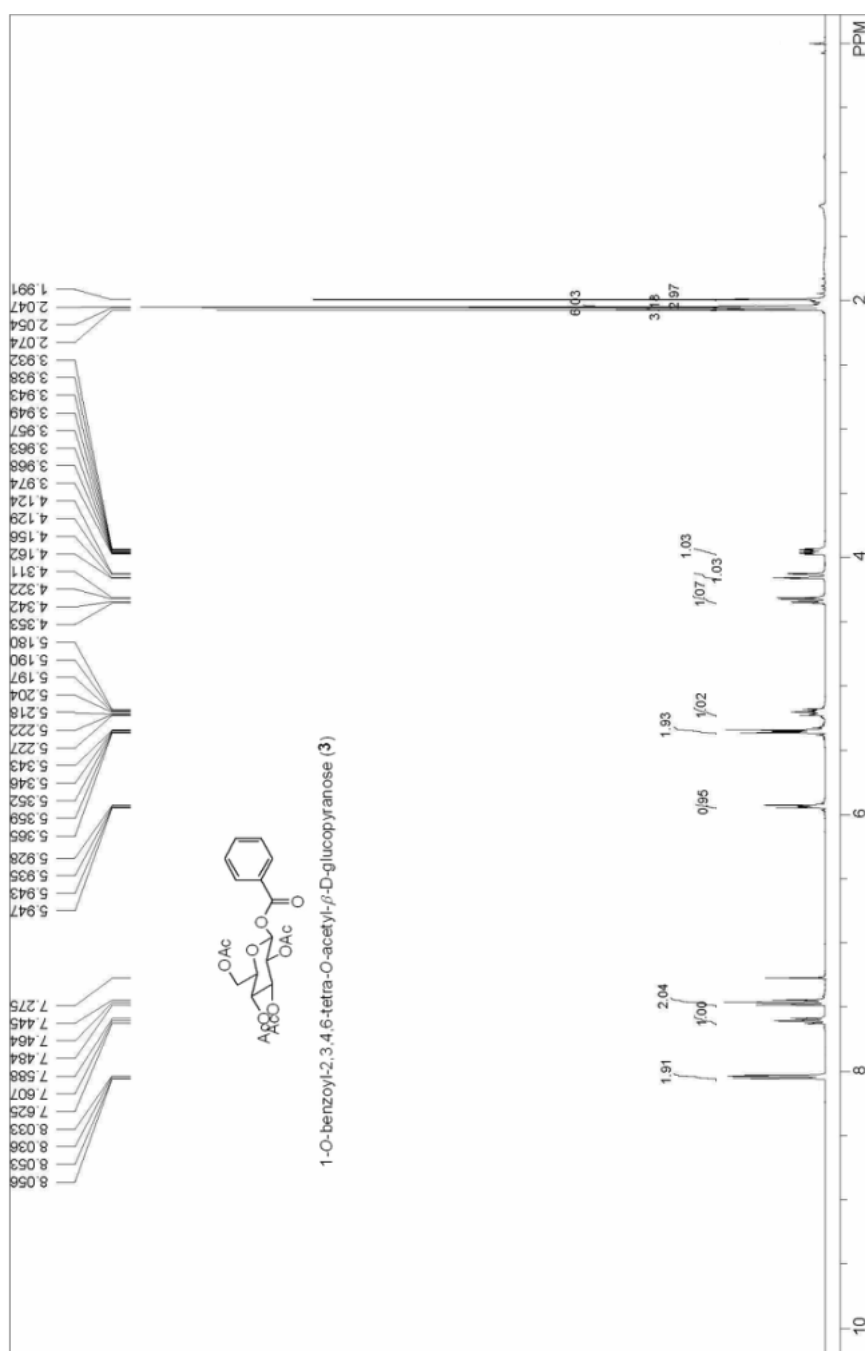

**Figure S1.**  $^1\text{H}$  NMR spectrum of compound **3**

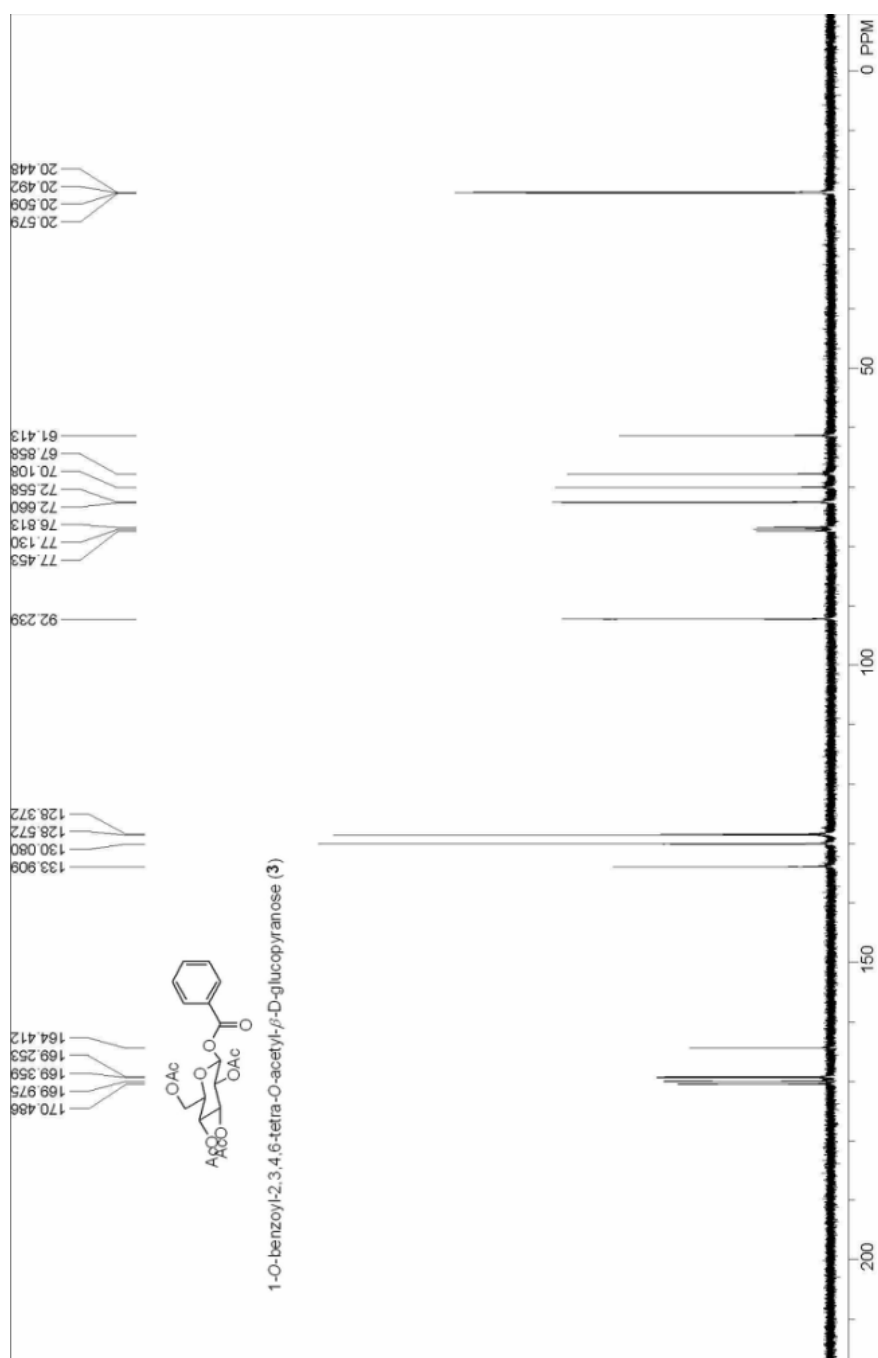

**Figure S2.** <sup>13</sup>C NMR spectrum of compound 3

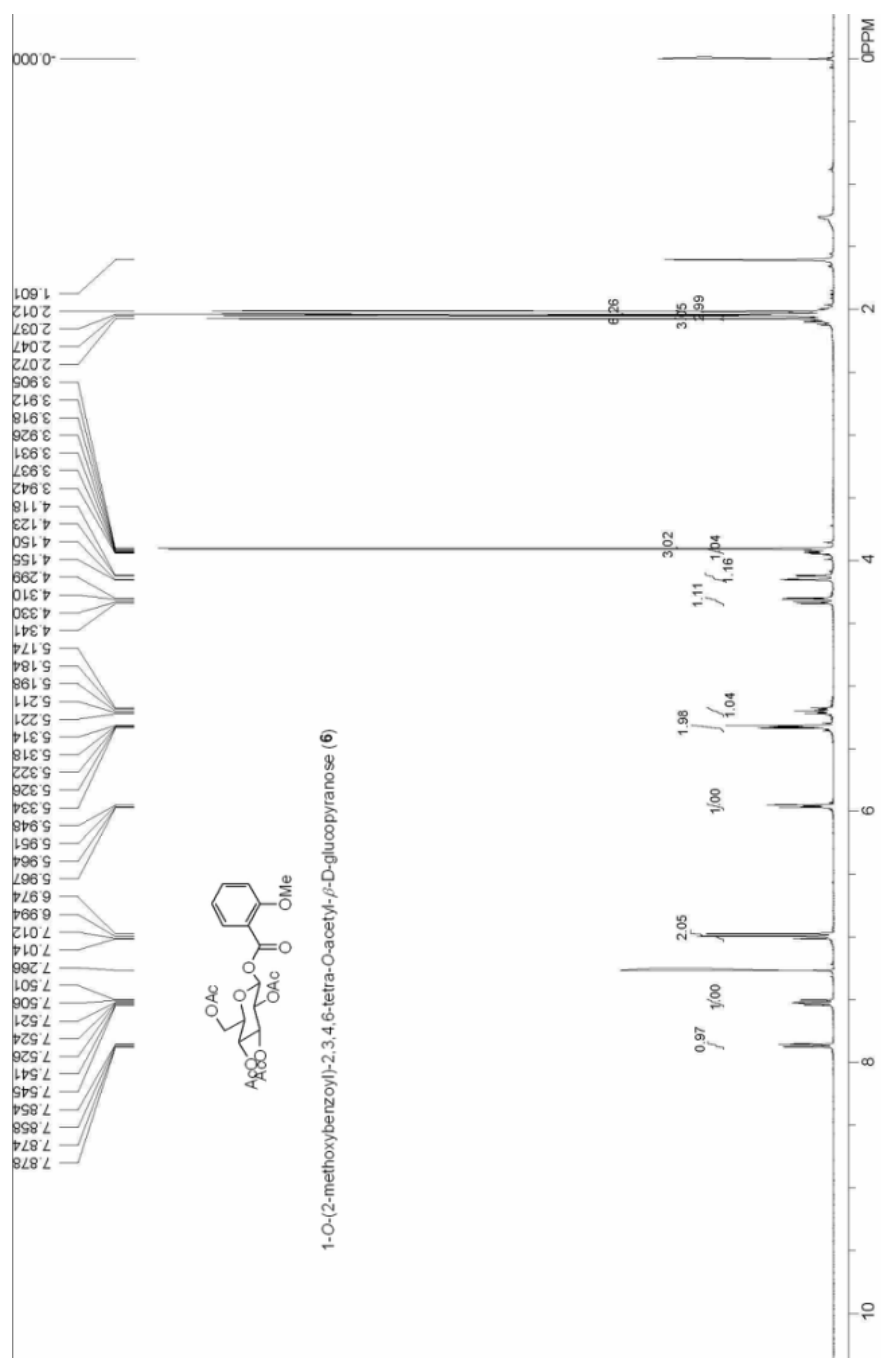

**Figure S3.** <sup>1</sup>H NMR spectrum of compound **6**

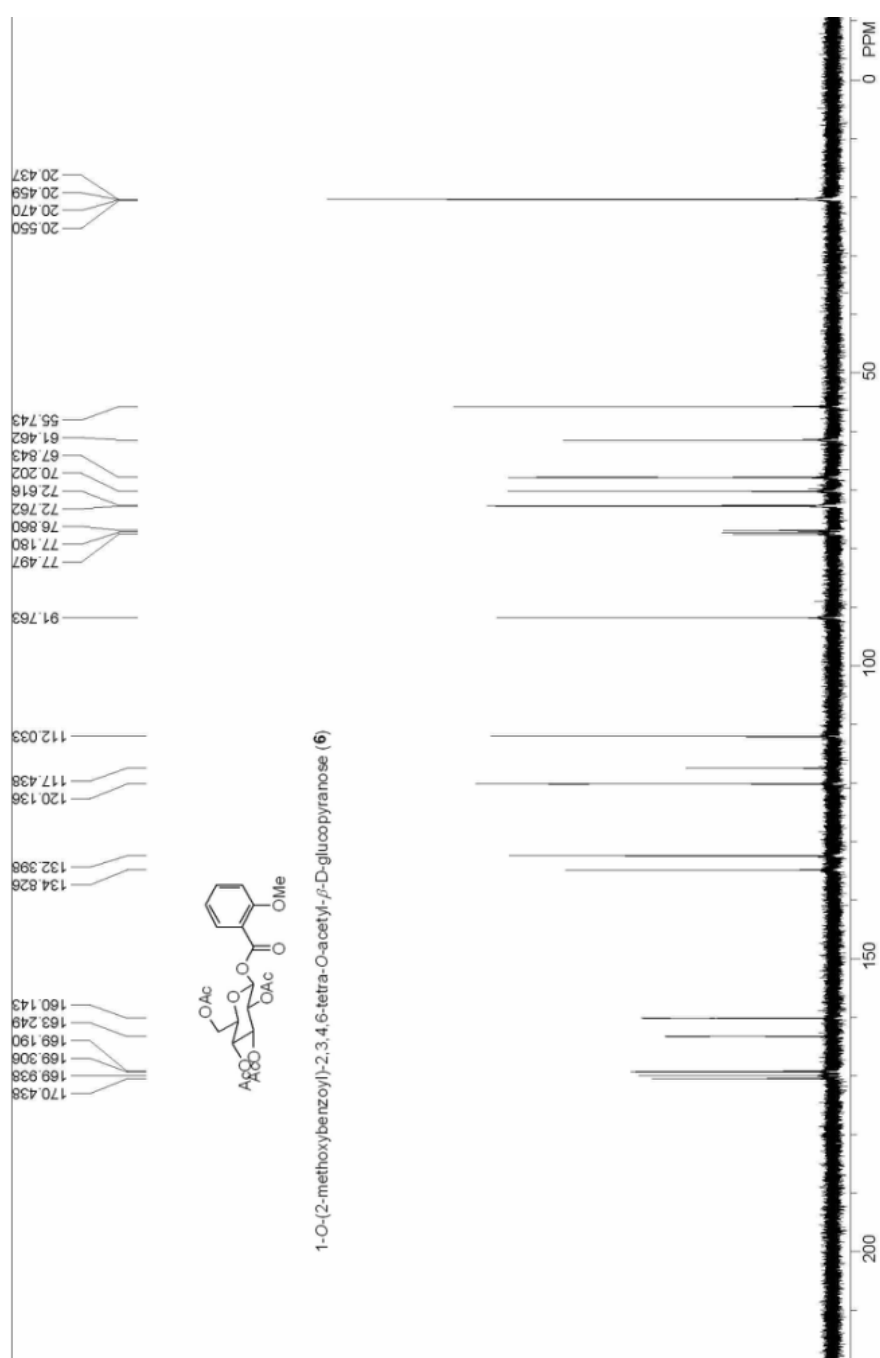

**Figure S4.**  $^{13}\text{C}$  NMR spectrum of compound **6**

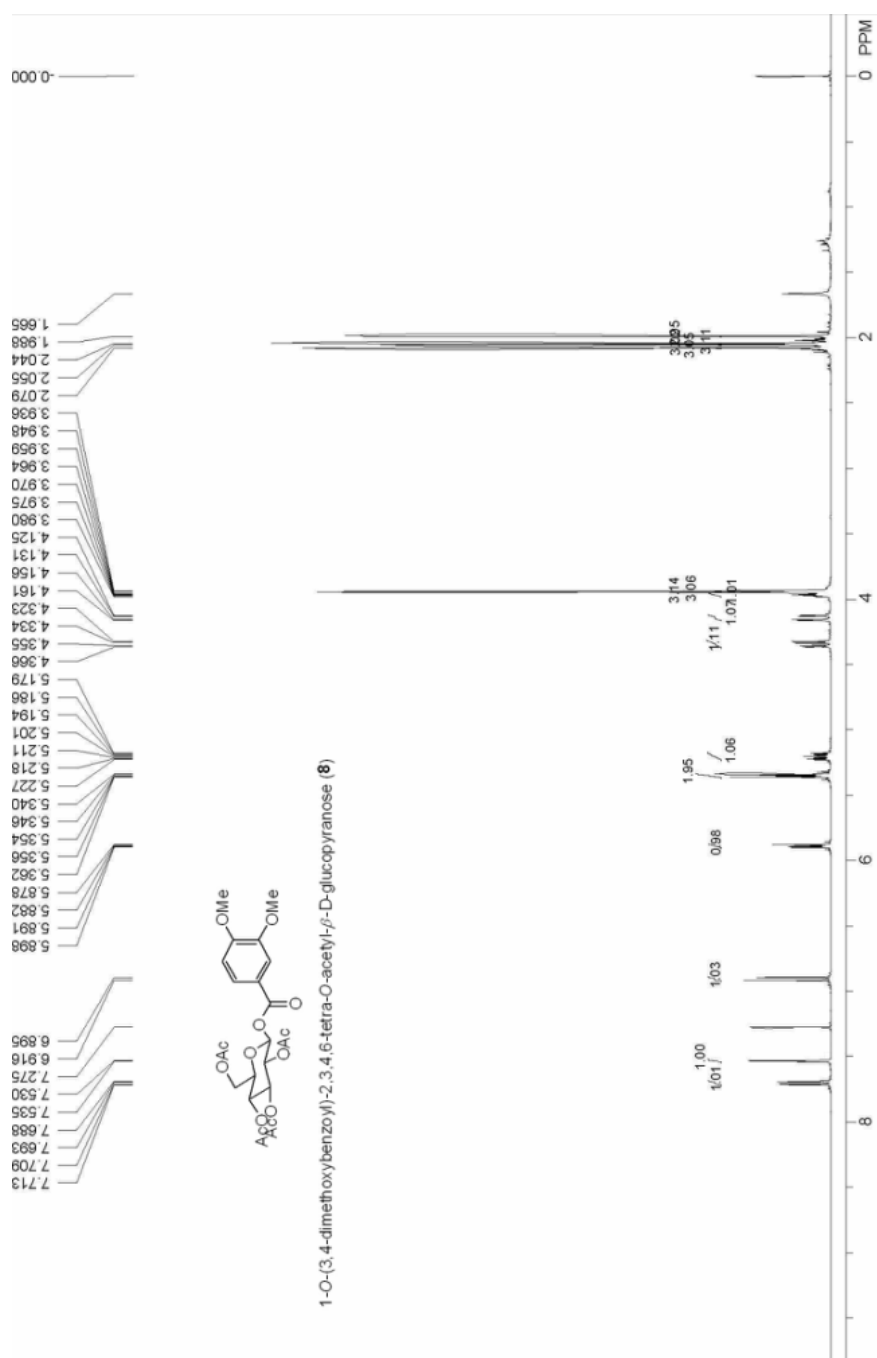

**Figure S5.** <sup>1</sup>H NMR spectrum of compound **8**

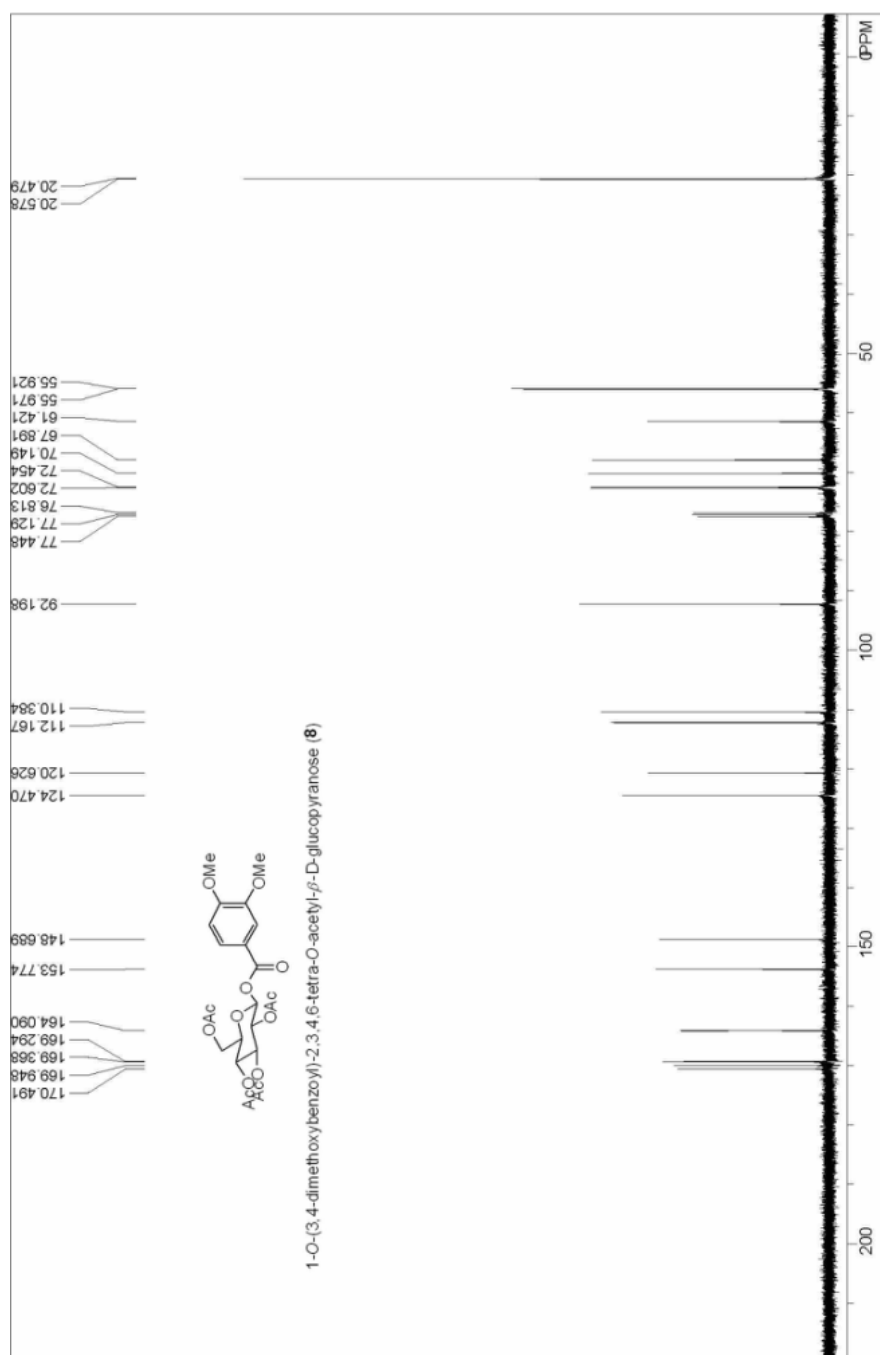

**Figure S6.** <sup>13</sup>C NMR spectrum of compound **8**

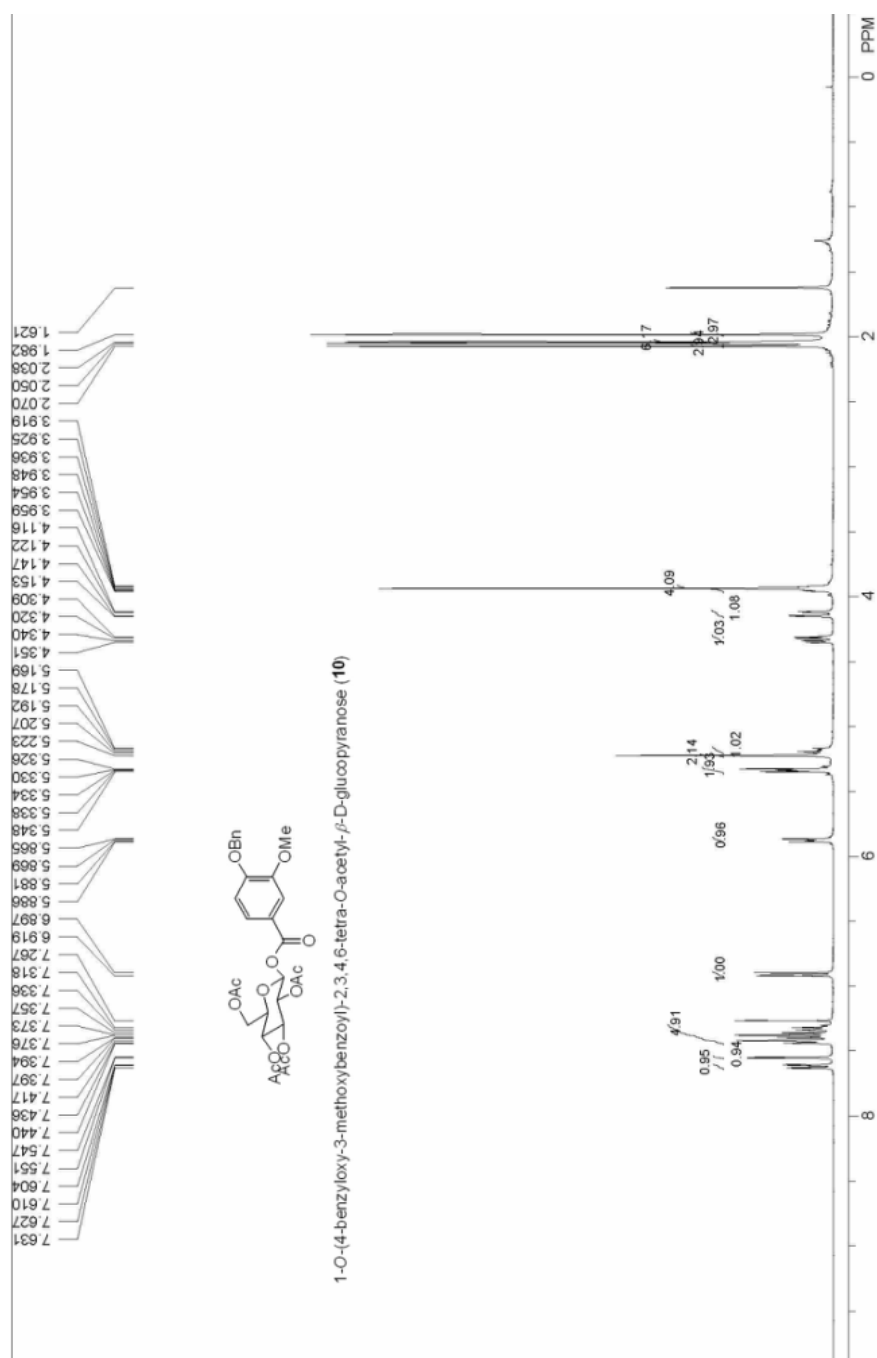

**Figure S7.** <sup>1</sup>H NMR spectrum of compound **10**



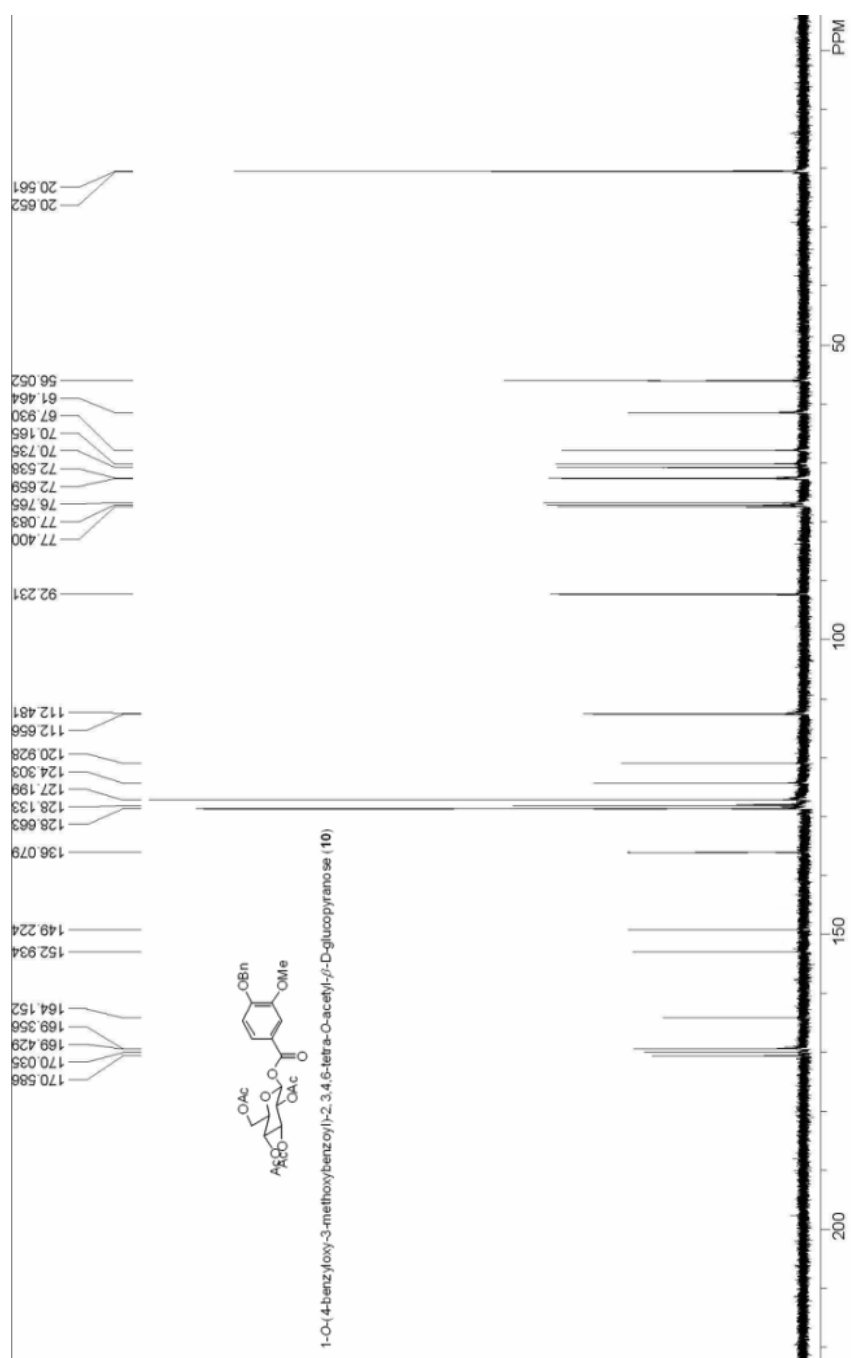

**Figure S8.**  $^{13}\text{C}$  NMR spectrum of compound **10**

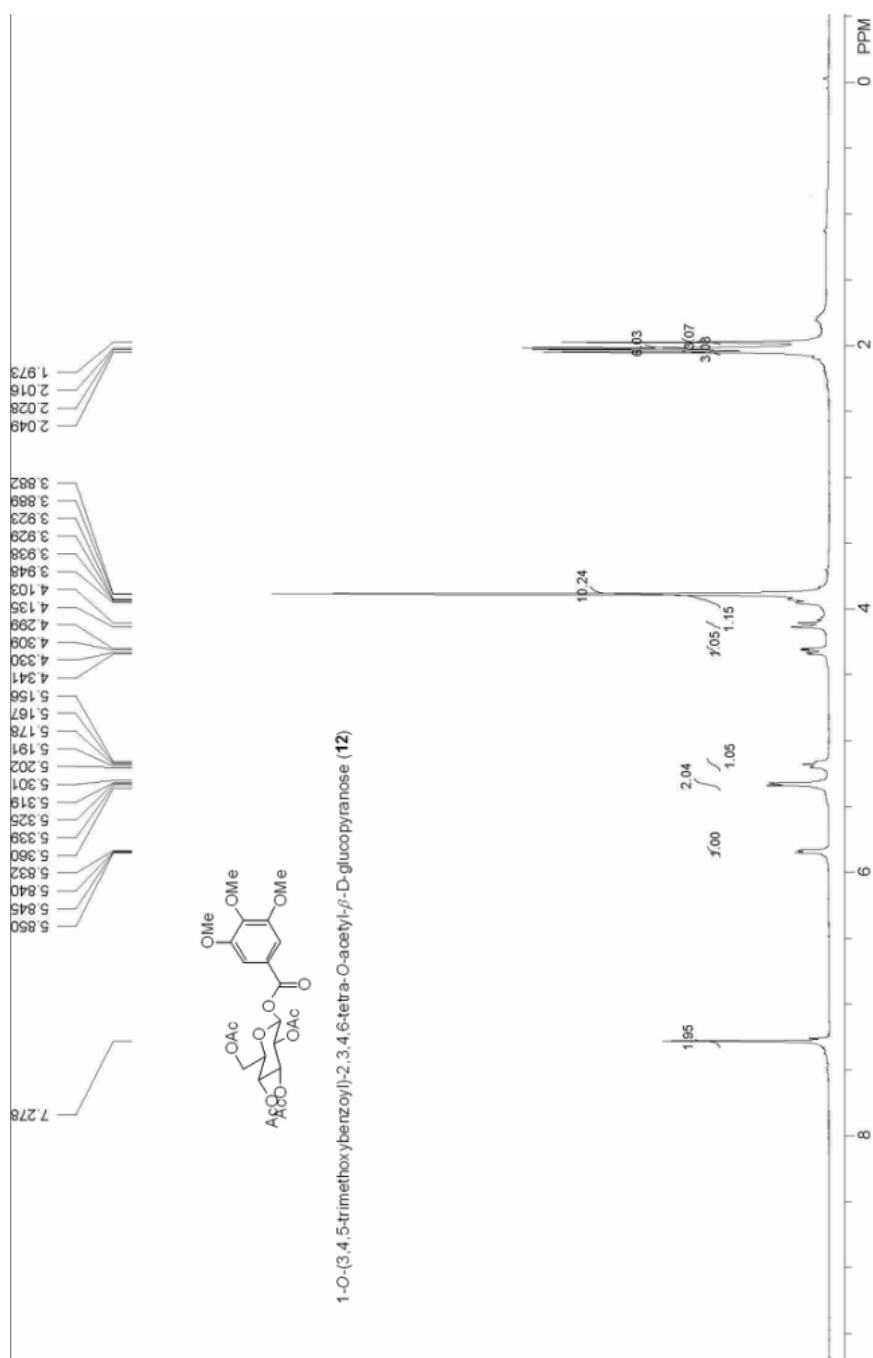

**Figure S9.** <sup>1</sup>H NMR spectrum of compound 12

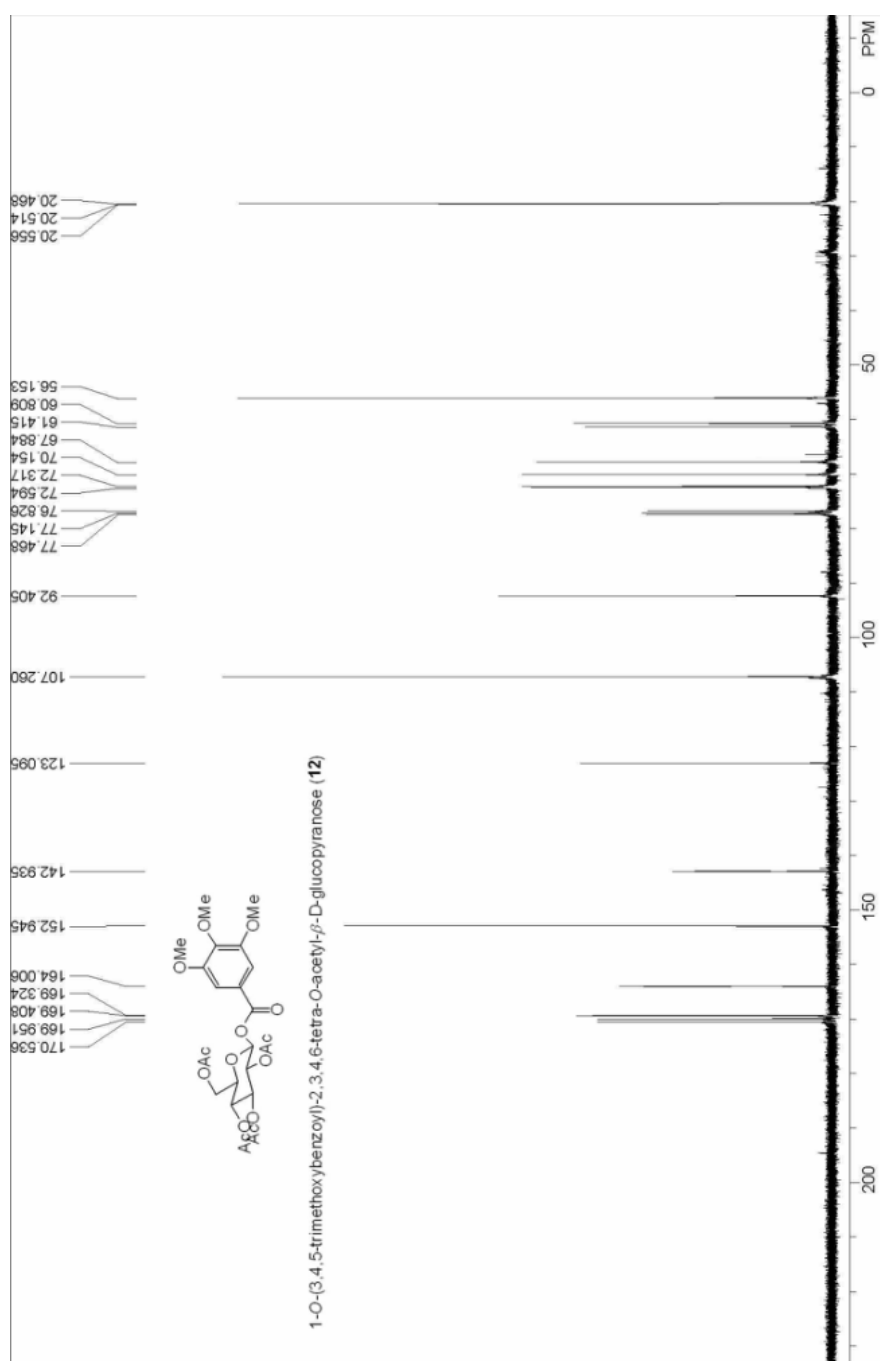

**Figure S10.**  $^{13}\text{C}$  NMR spectrum of compound 12

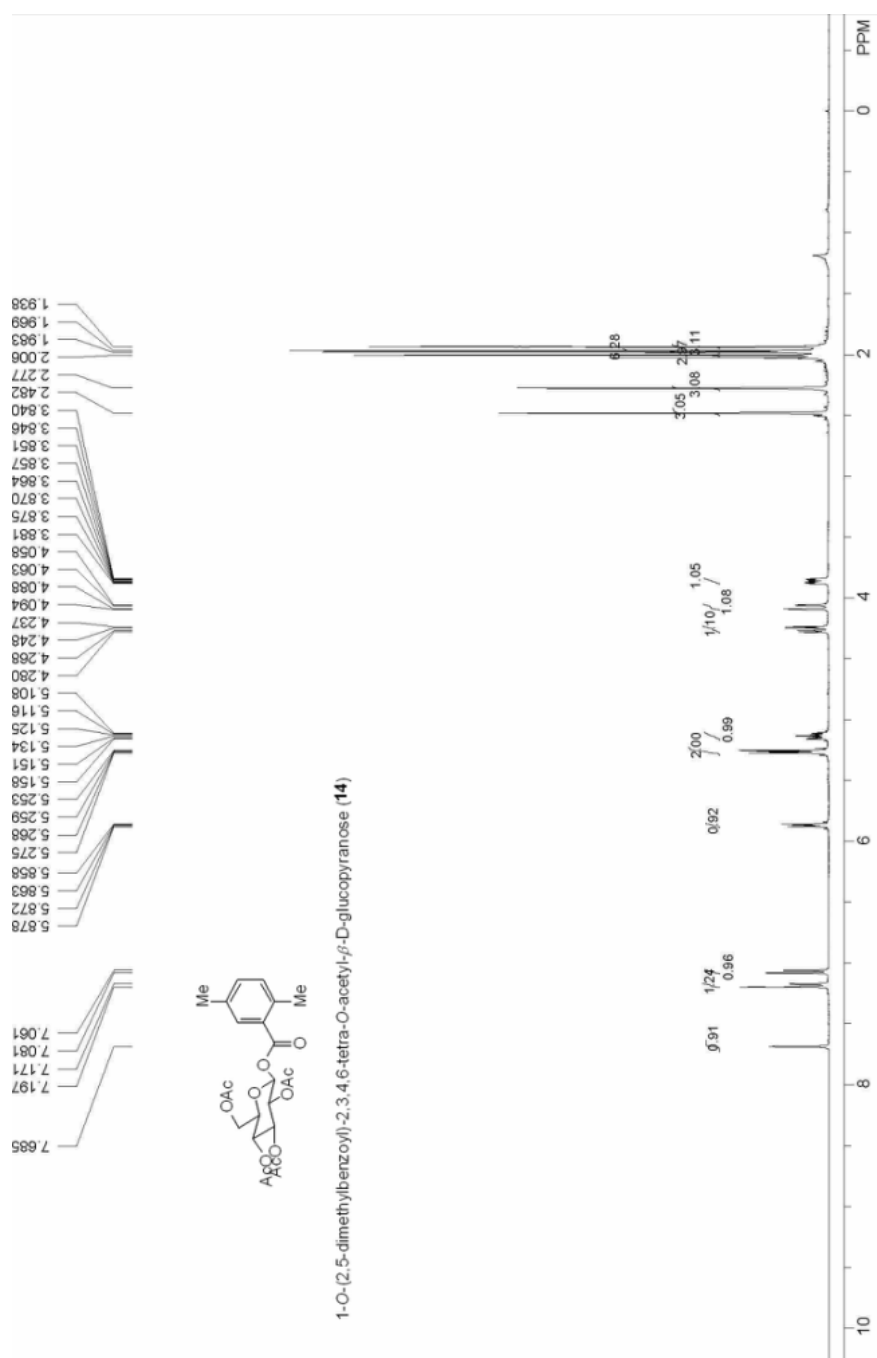

**Figure S11.** <sup>1</sup>H NMR spectrum of compound **14**

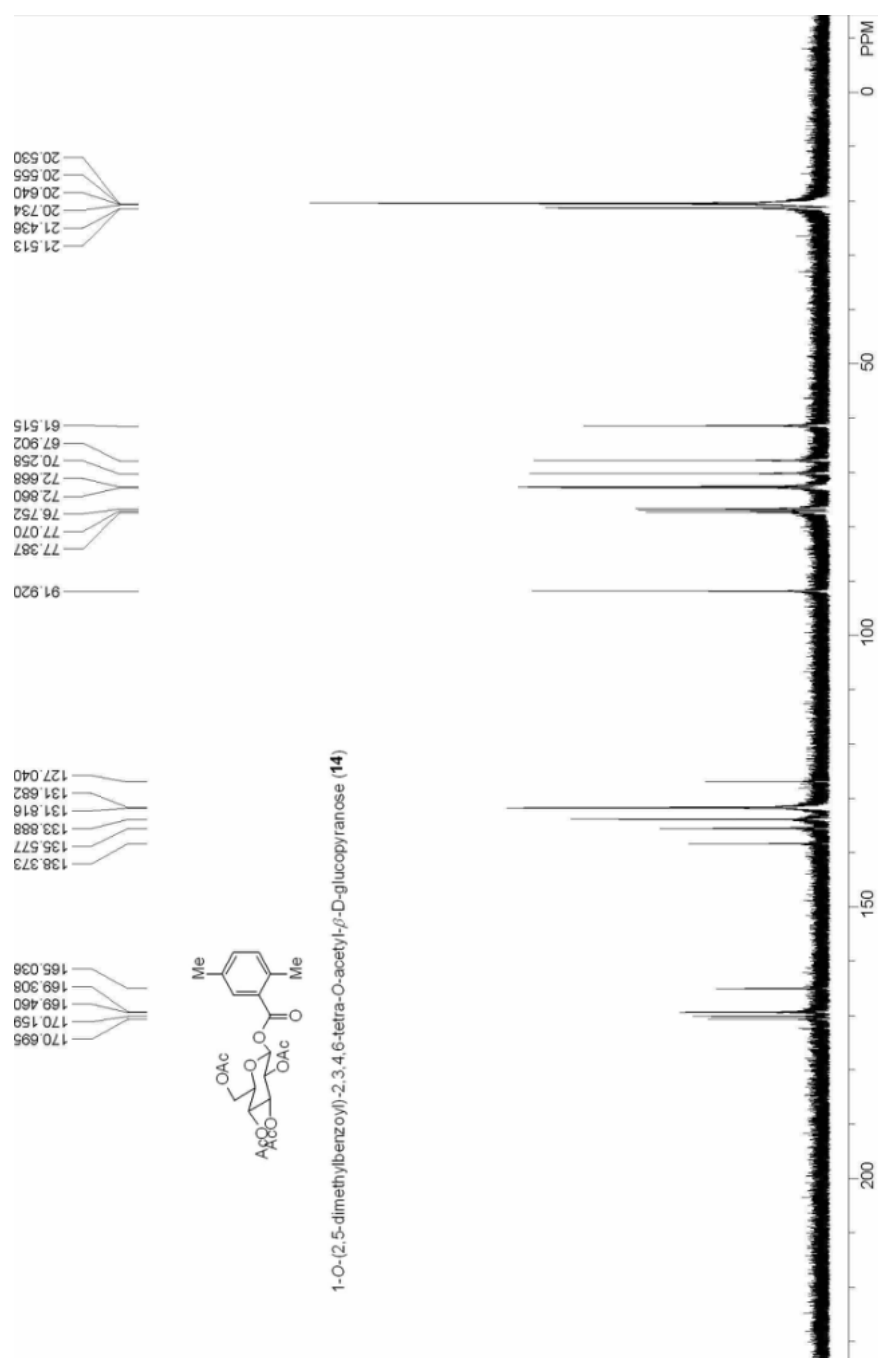

**Figure S12.**  $^{13}\text{C}$  NMR spectrum of compound **14**

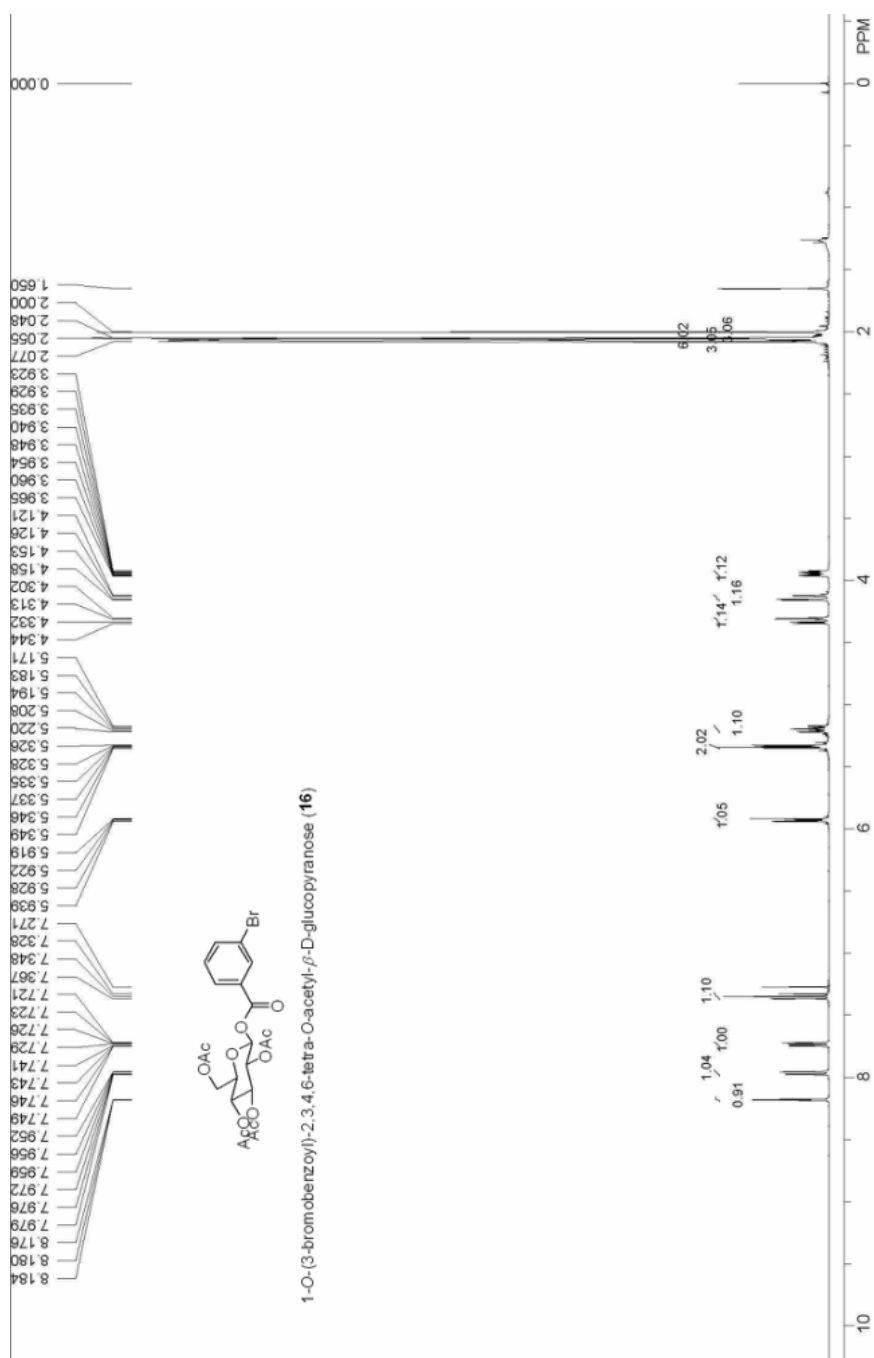

**Figure S13.** <sup>1</sup>H NMR spectrum of compound 16

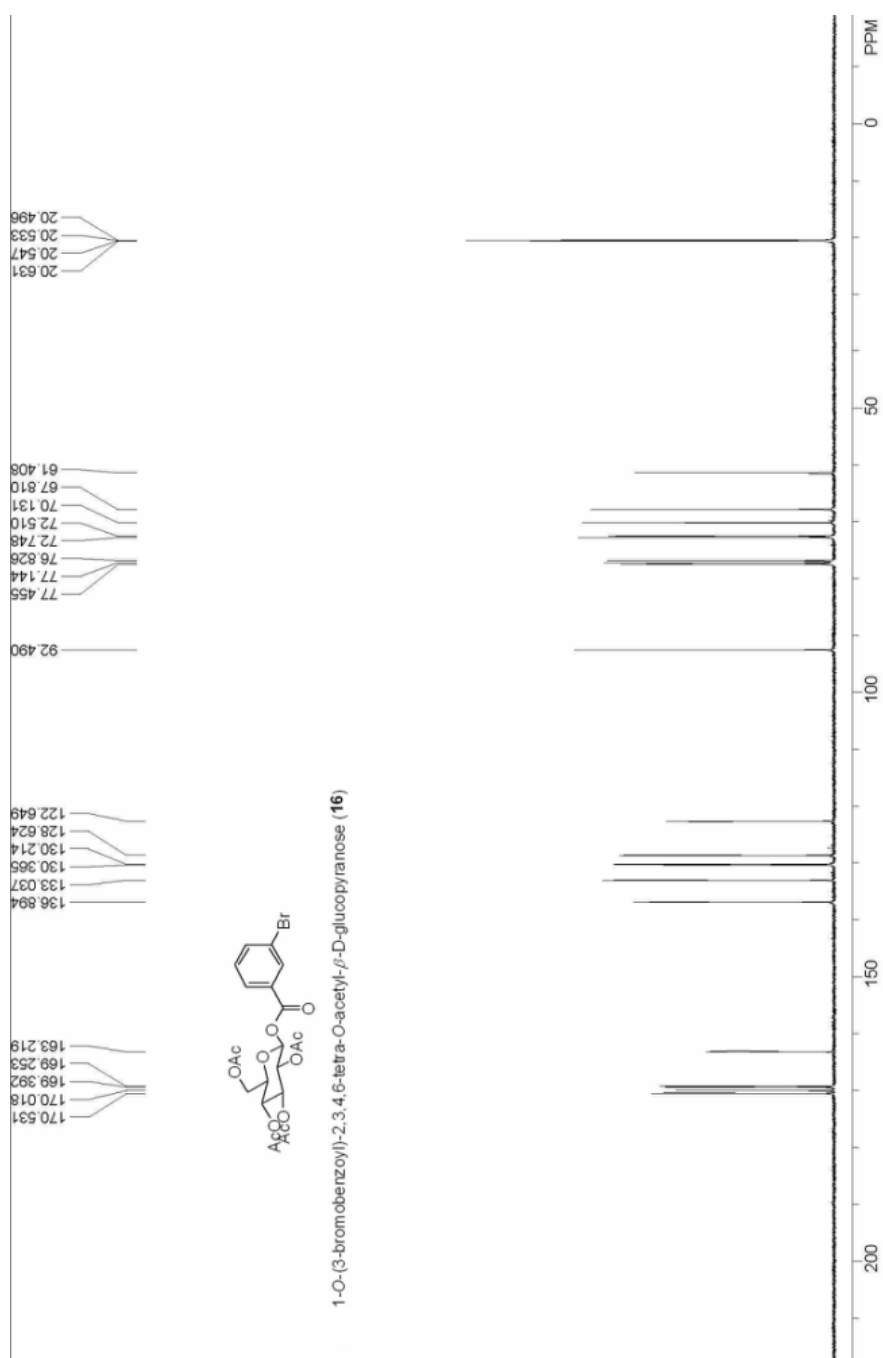

**Figure S14.** <sup>13</sup>C NMR spectrum of compound **16**

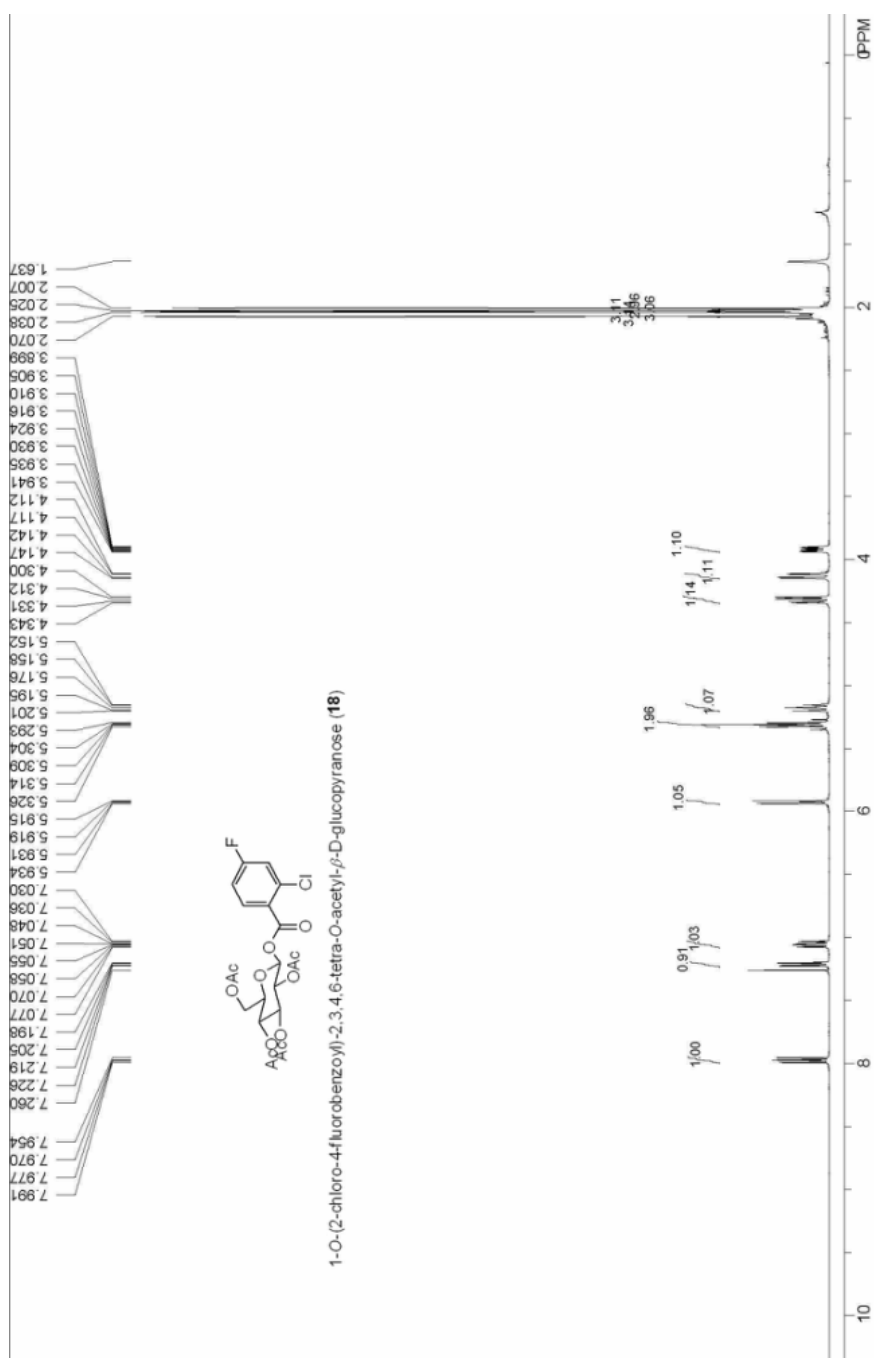

**Figure S15.** <sup>1</sup>H NMR spectrum of compound **18**



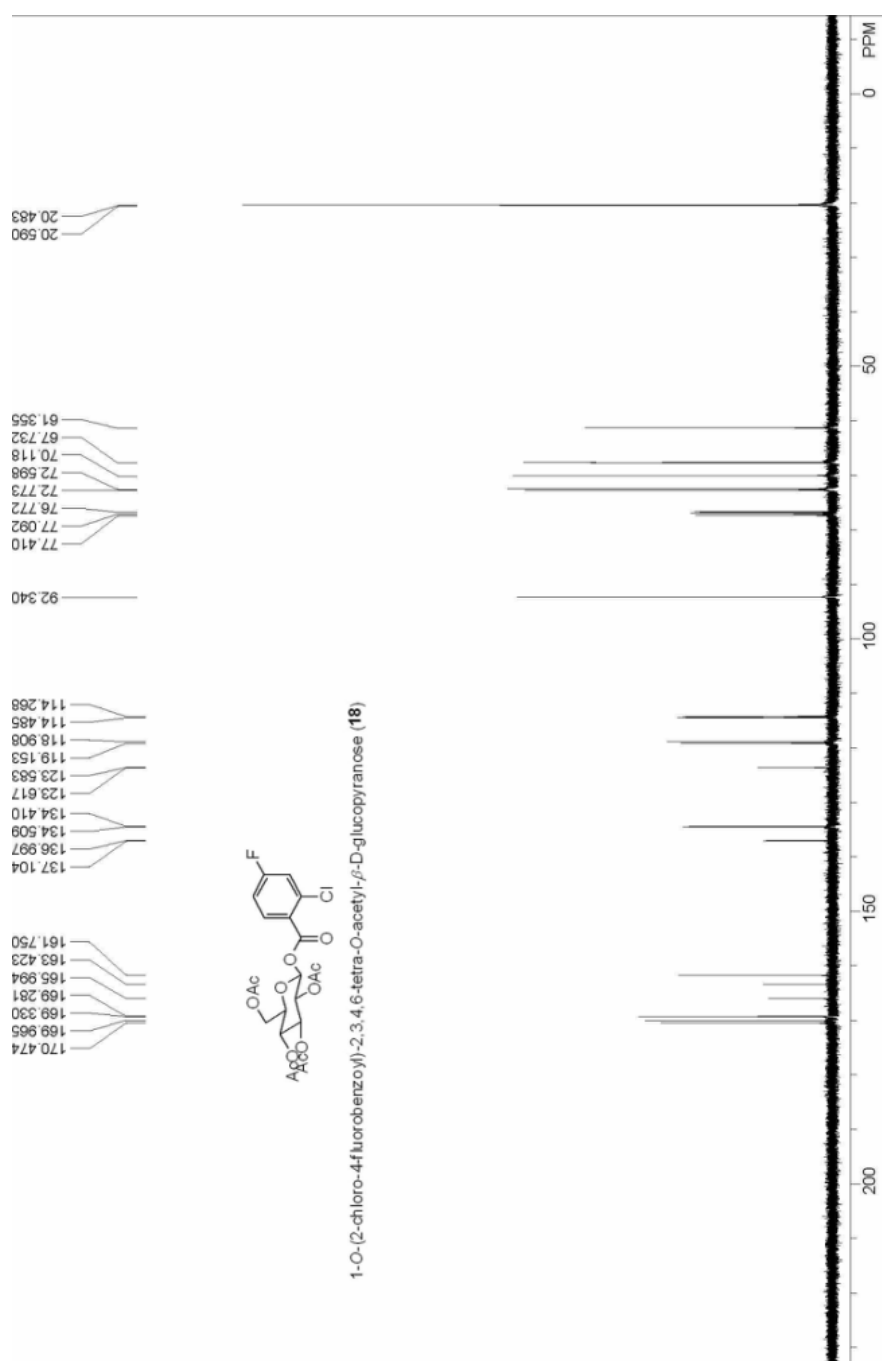

**Figure S16.** <sup>13</sup>C NMR spectrum of compound **18**

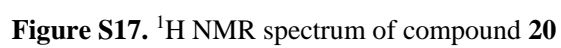

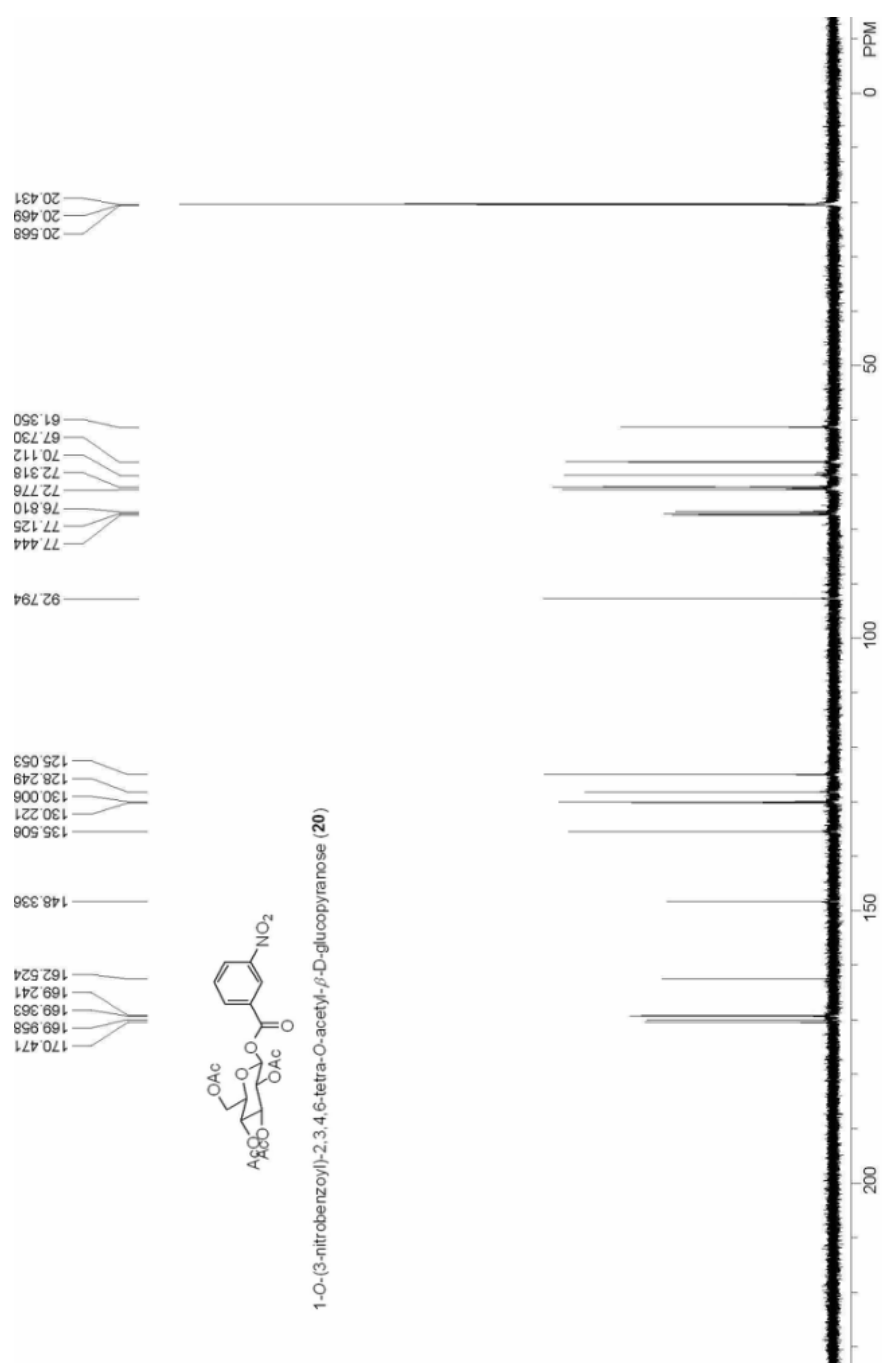

**Figure S18.** <sup>13</sup>C NMR spectrum of compound **20**



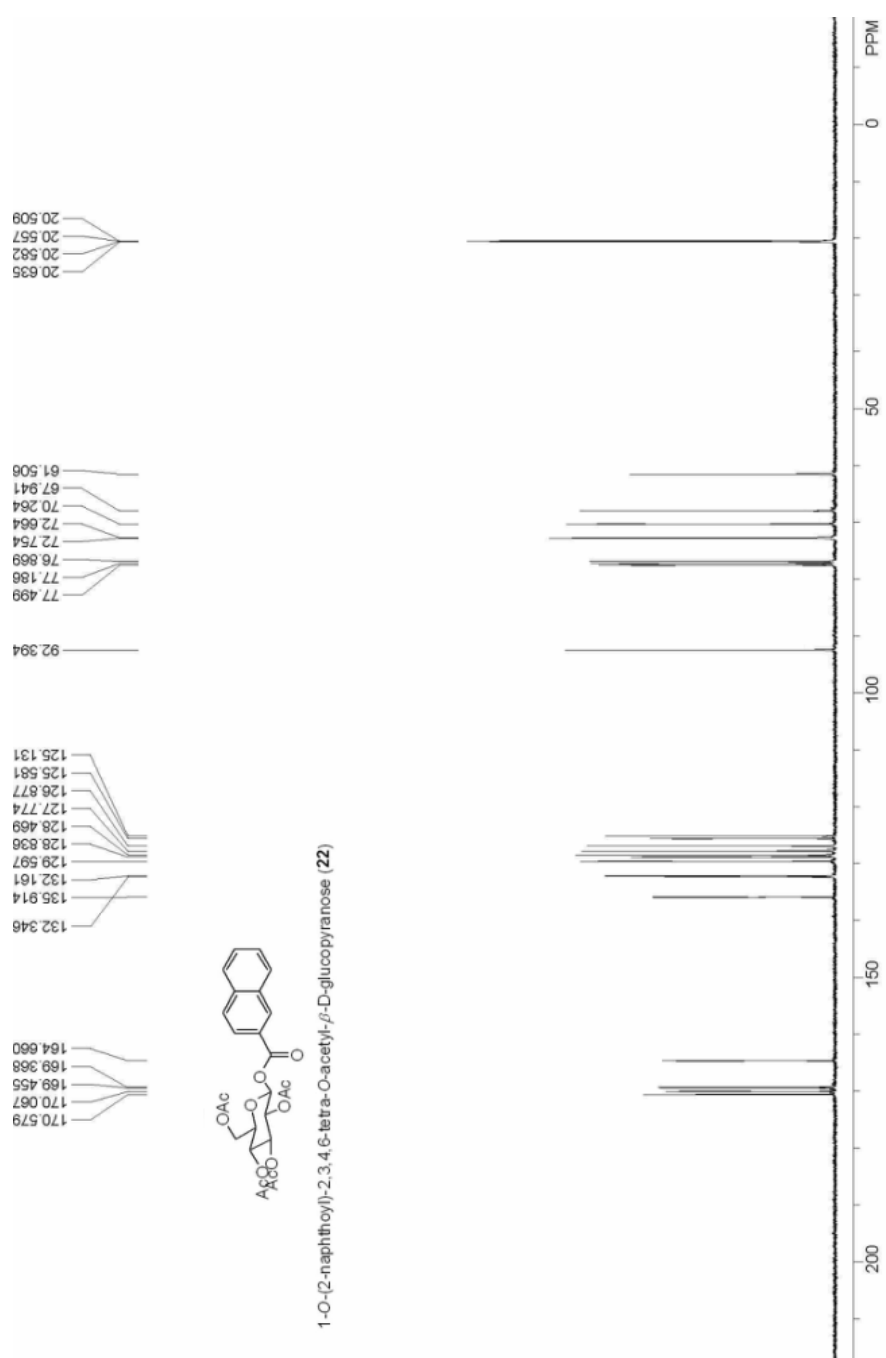

**Figure S20.** <sup>13</sup>C NMR spectrum of compound **22**

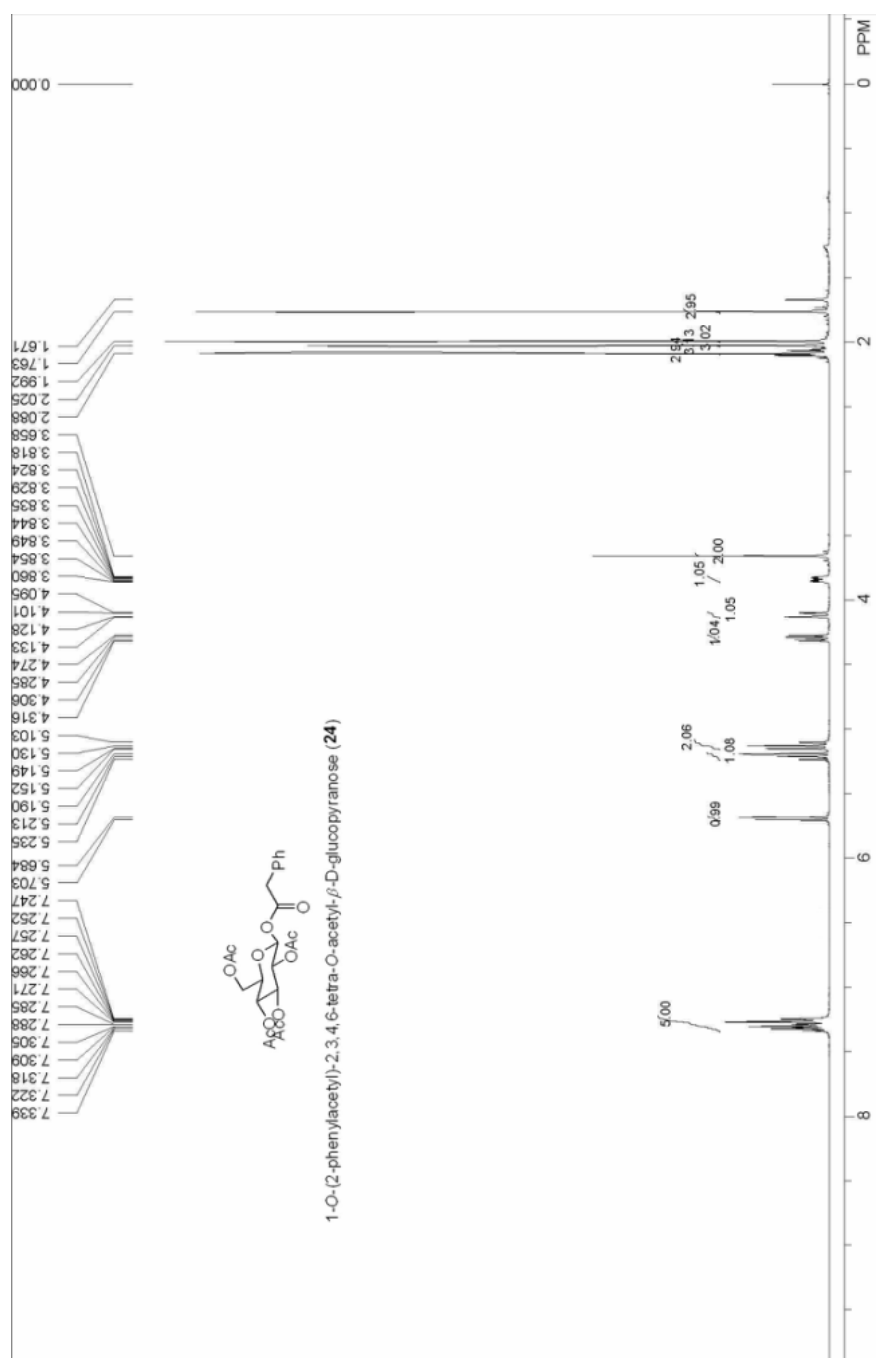

**Figure S21.** <sup>1</sup>H NMR spectrum of compound **24**

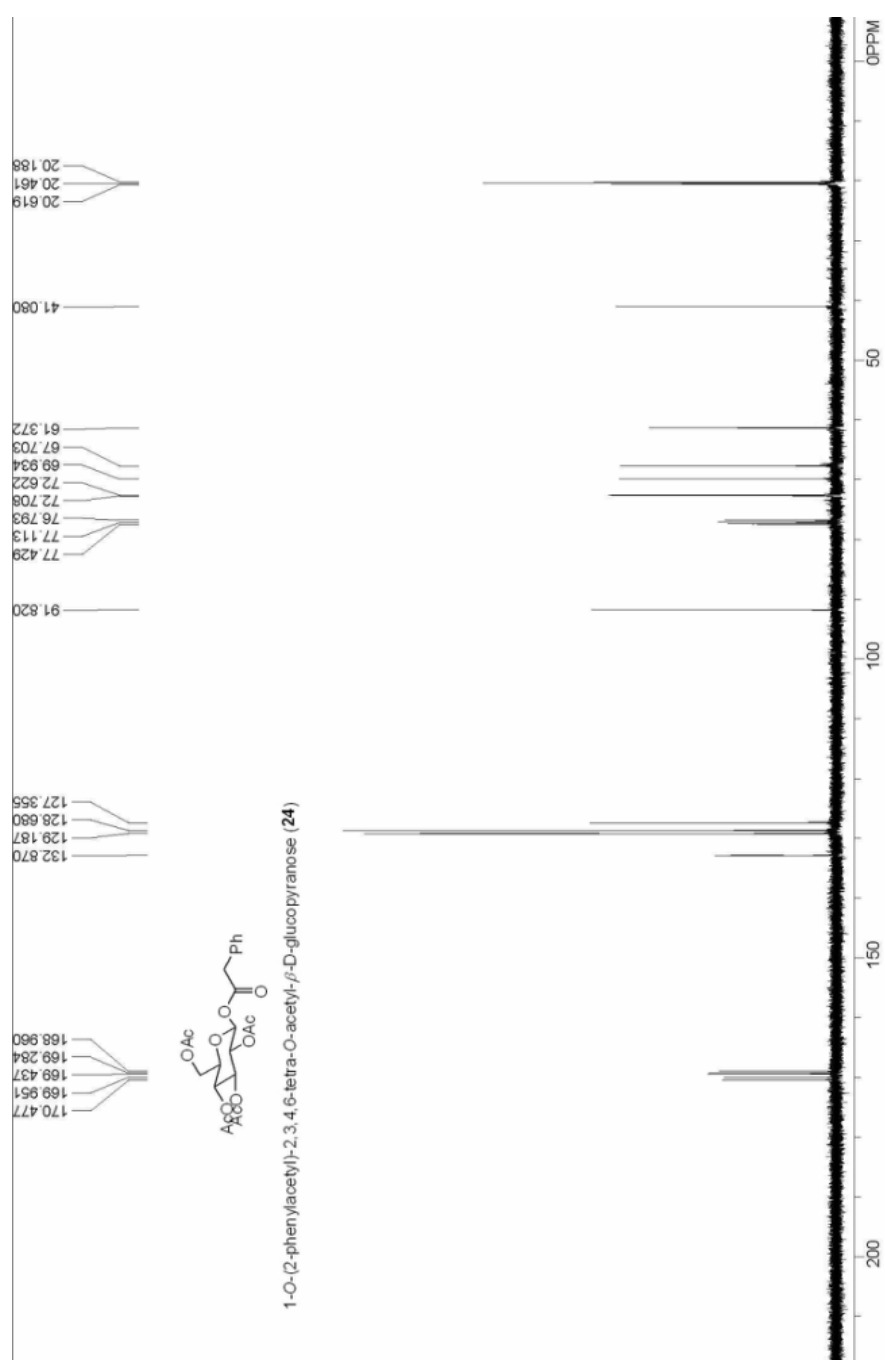

**Figure S22.** <sup>13</sup>C NMR spectrum of compound 24

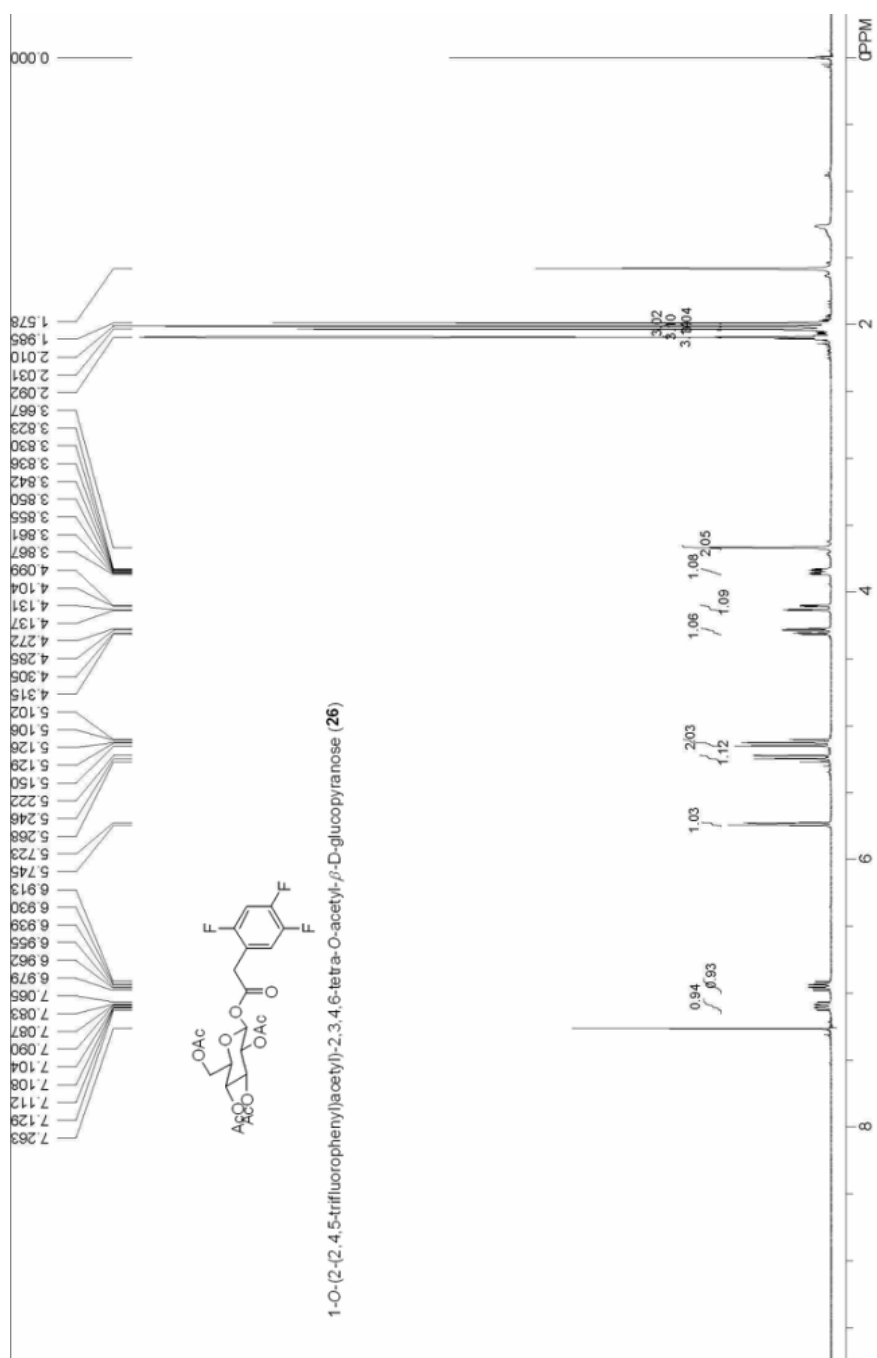

**Figure S23.** <sup>1</sup>H NMR spectrum of compound **26**



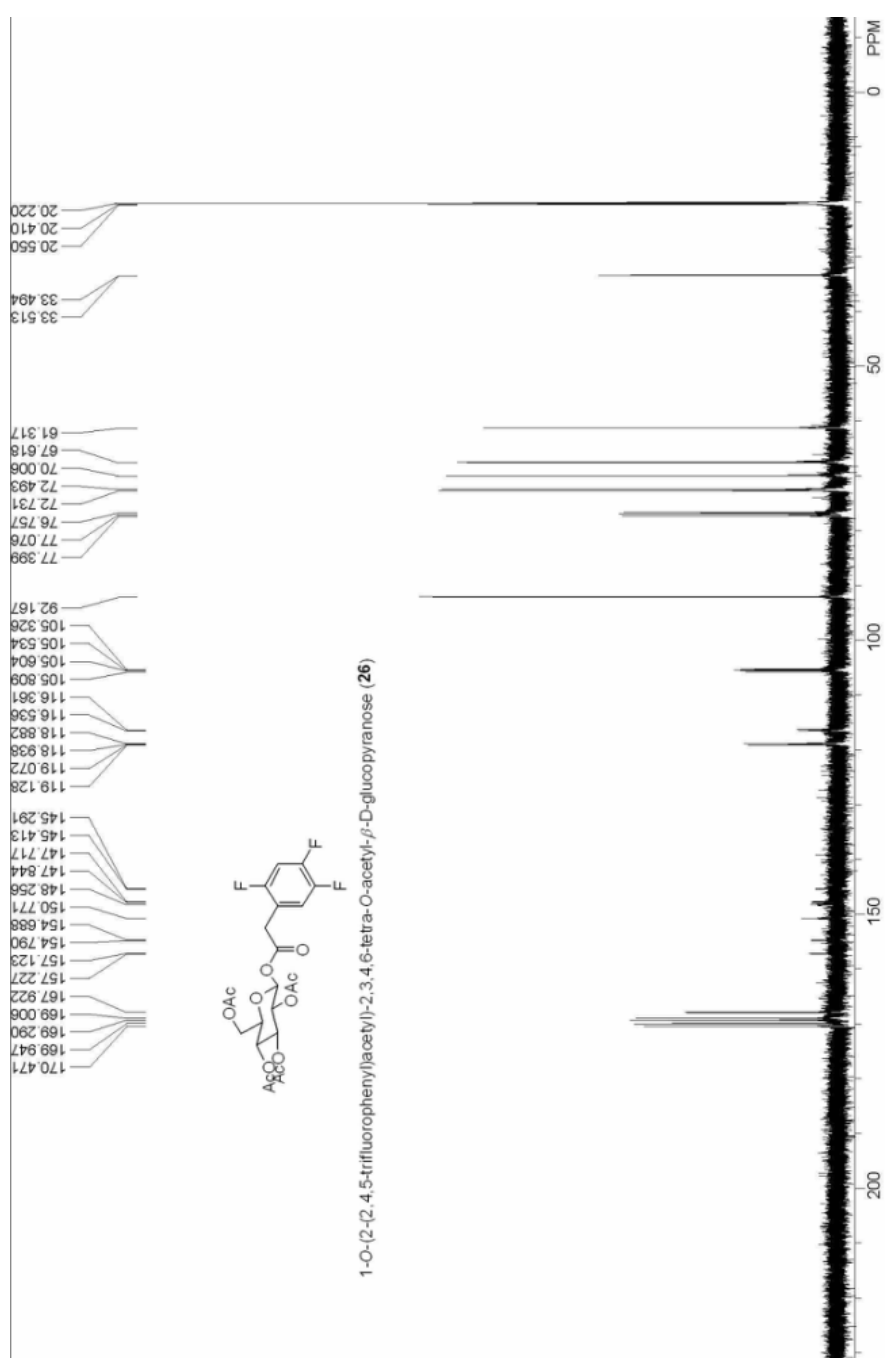

**Figure S24.**  $^{13}\text{C}$  NMR spectrum of compound **26**

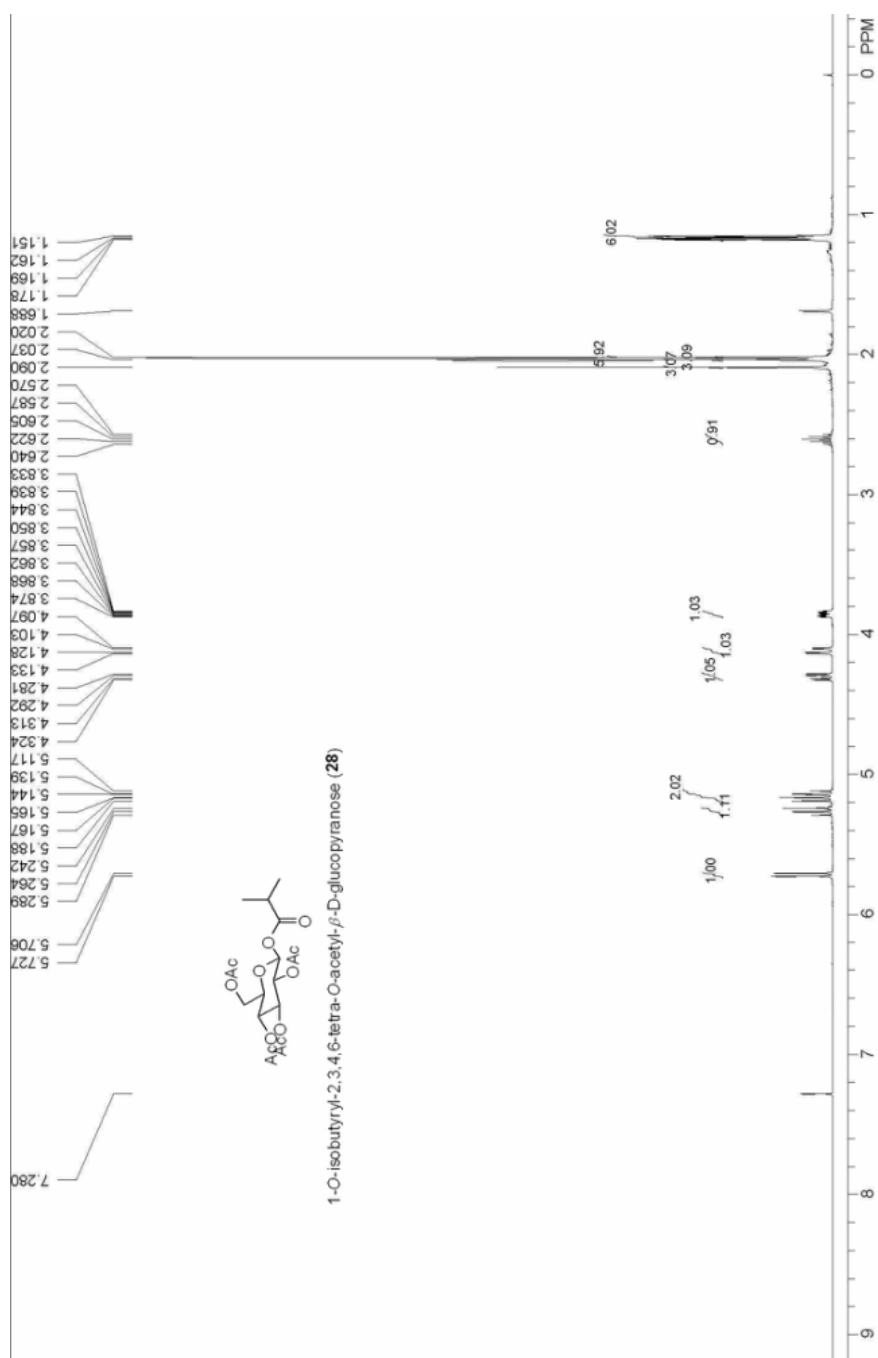

**Figure S25.** <sup>1</sup>H NMR spectrum of compound **28**

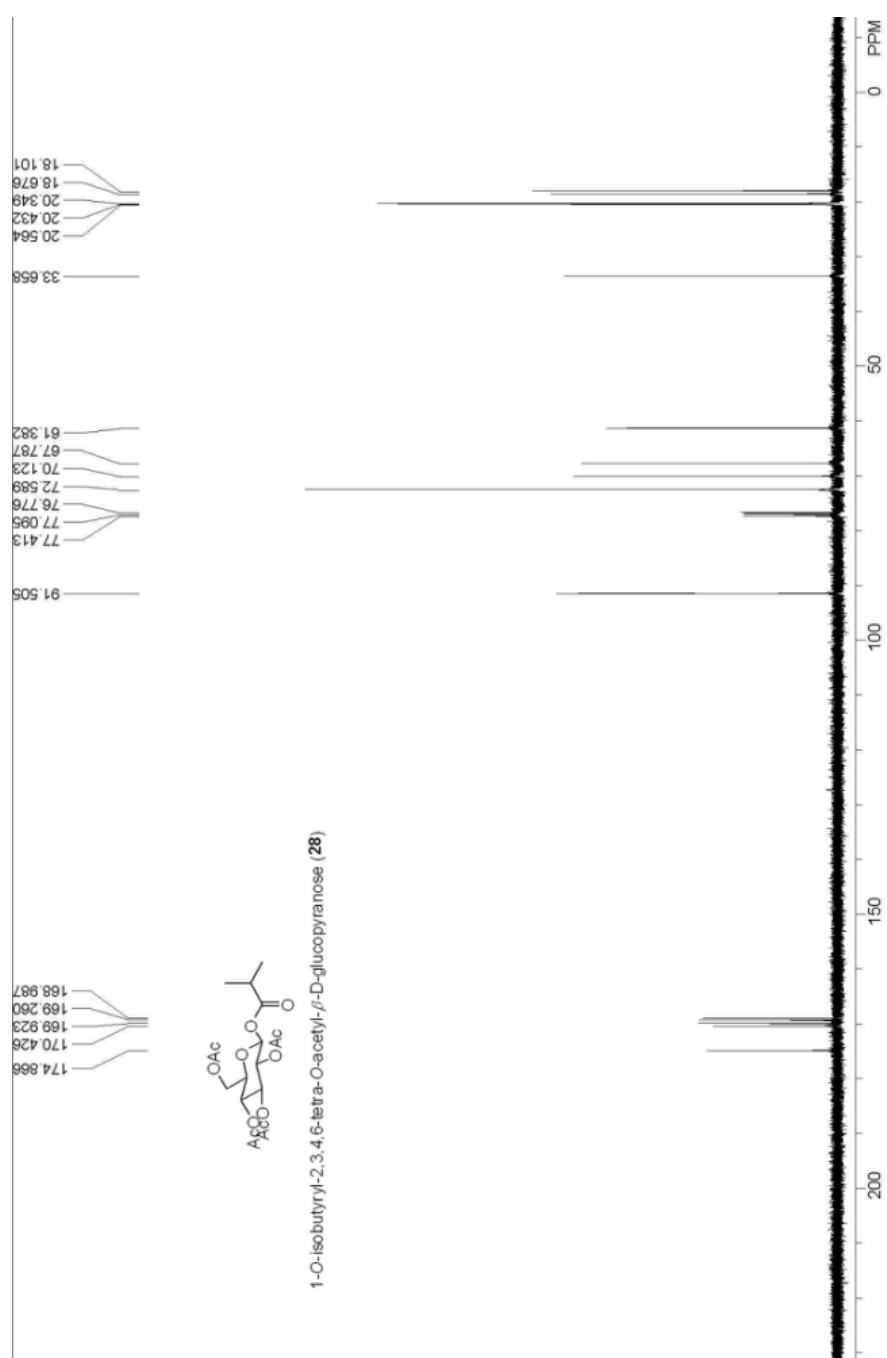

**Figure S26.** <sup>13</sup>C NMR spectrum of compound **28**

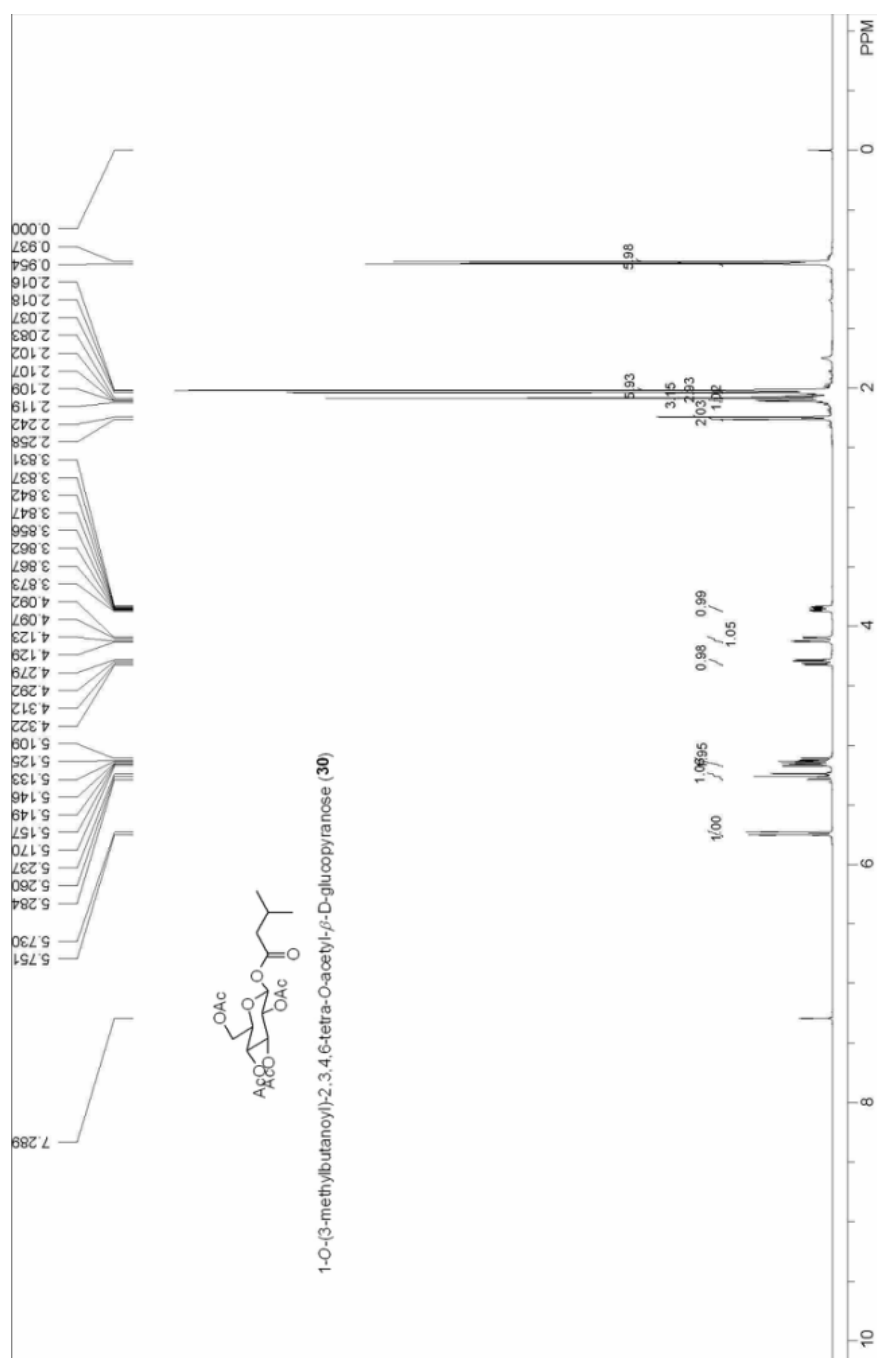

**Figure S27.** <sup>1</sup>H NMR spectrum of compound 30

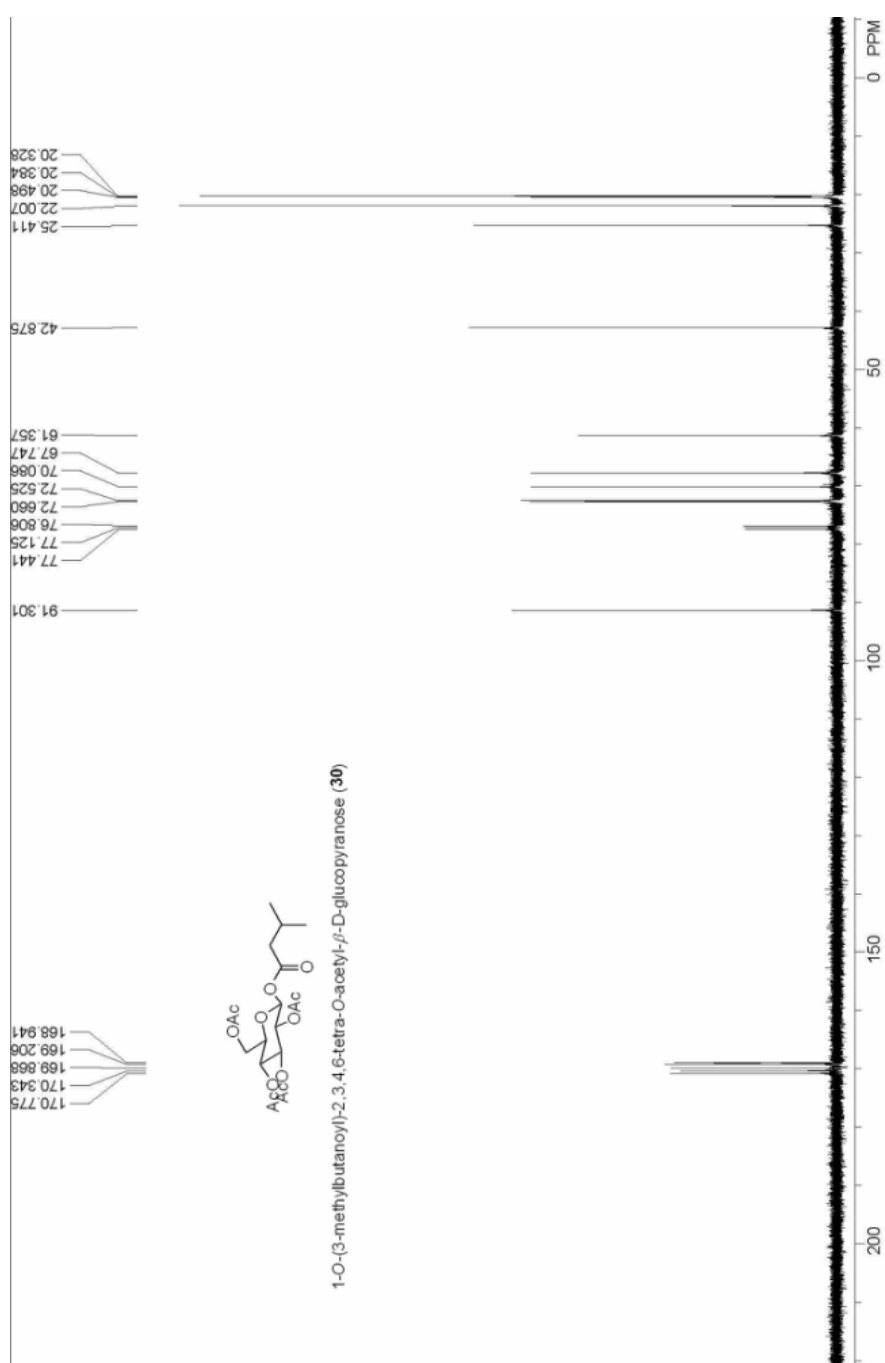

**Figure S28.** <sup>13</sup>C NMR spectrum of compound **30**

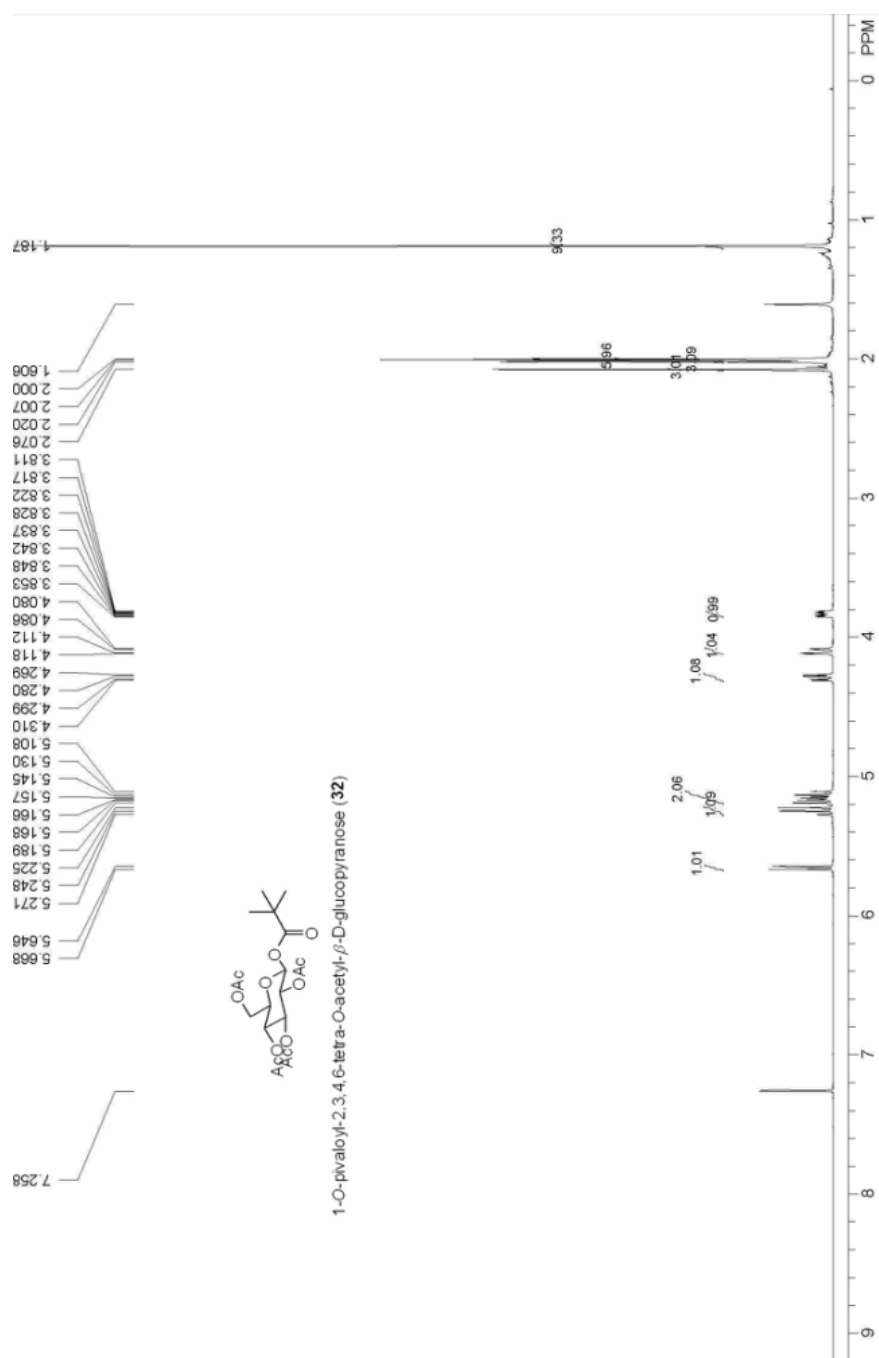

**Figure S29.**  $^1\text{H}$  NMR spectrum of compound **32**

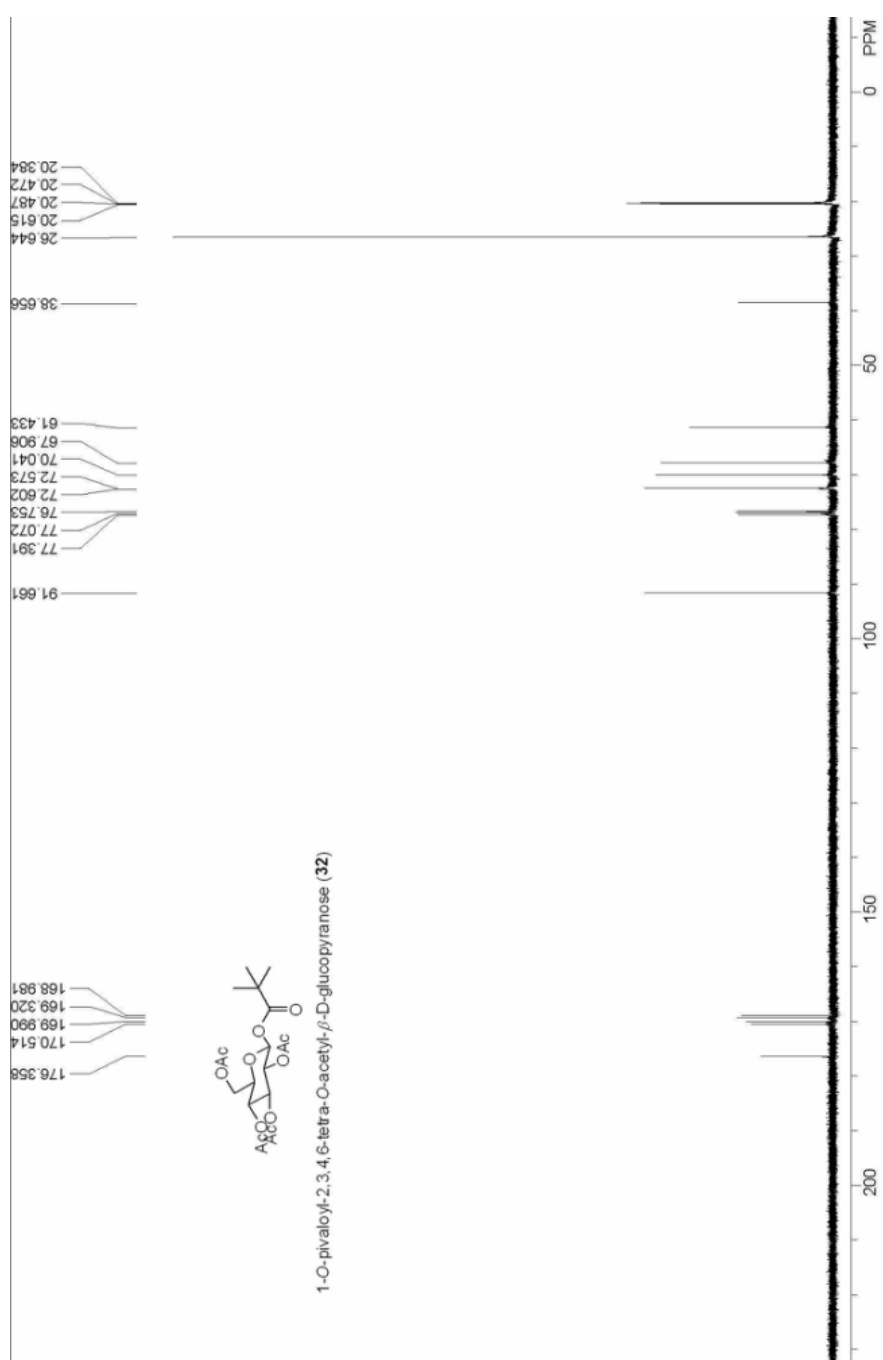

**Figure S30.**  $^{13}\text{C}$  NMR spectrum of compound 32

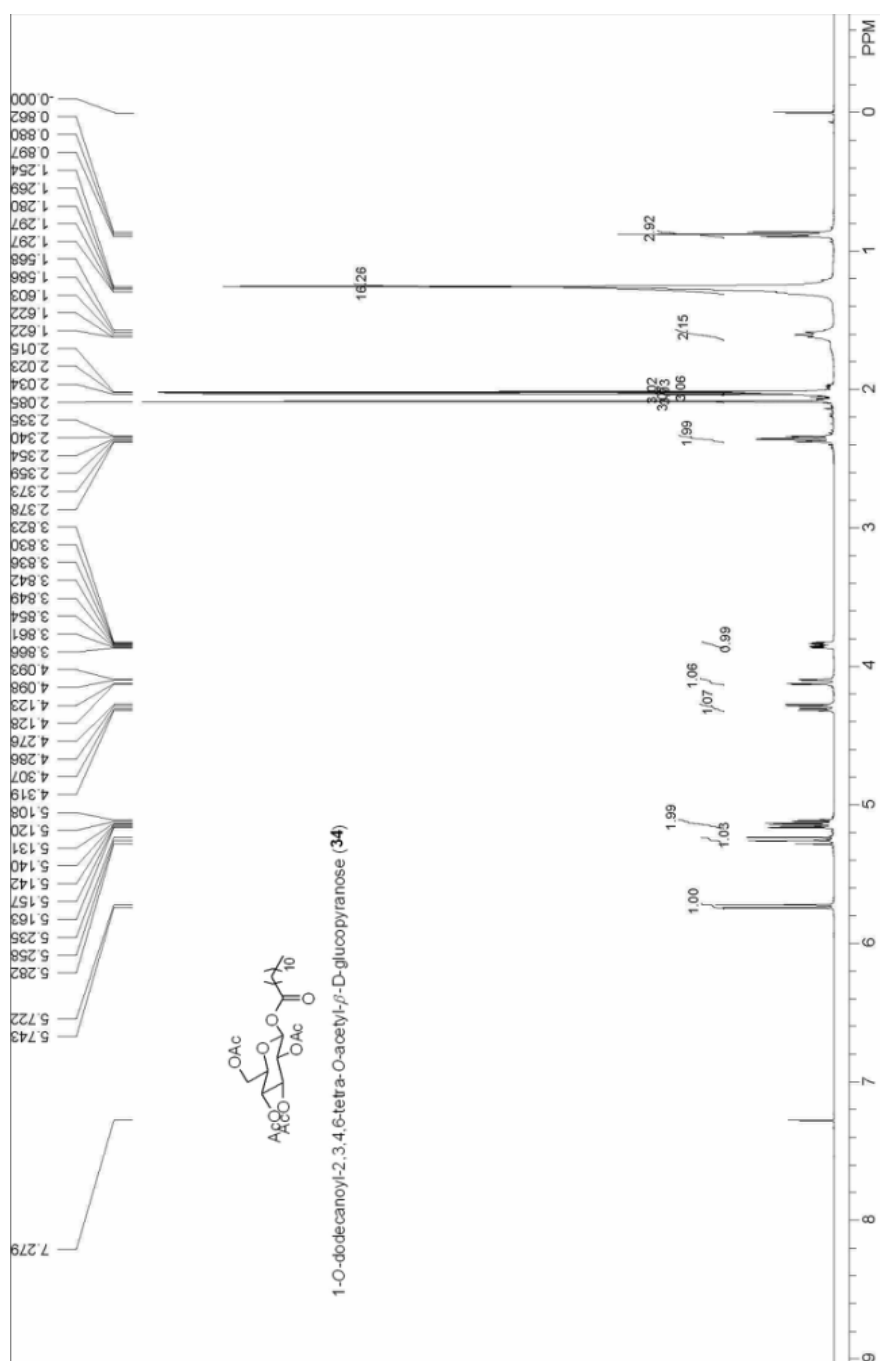



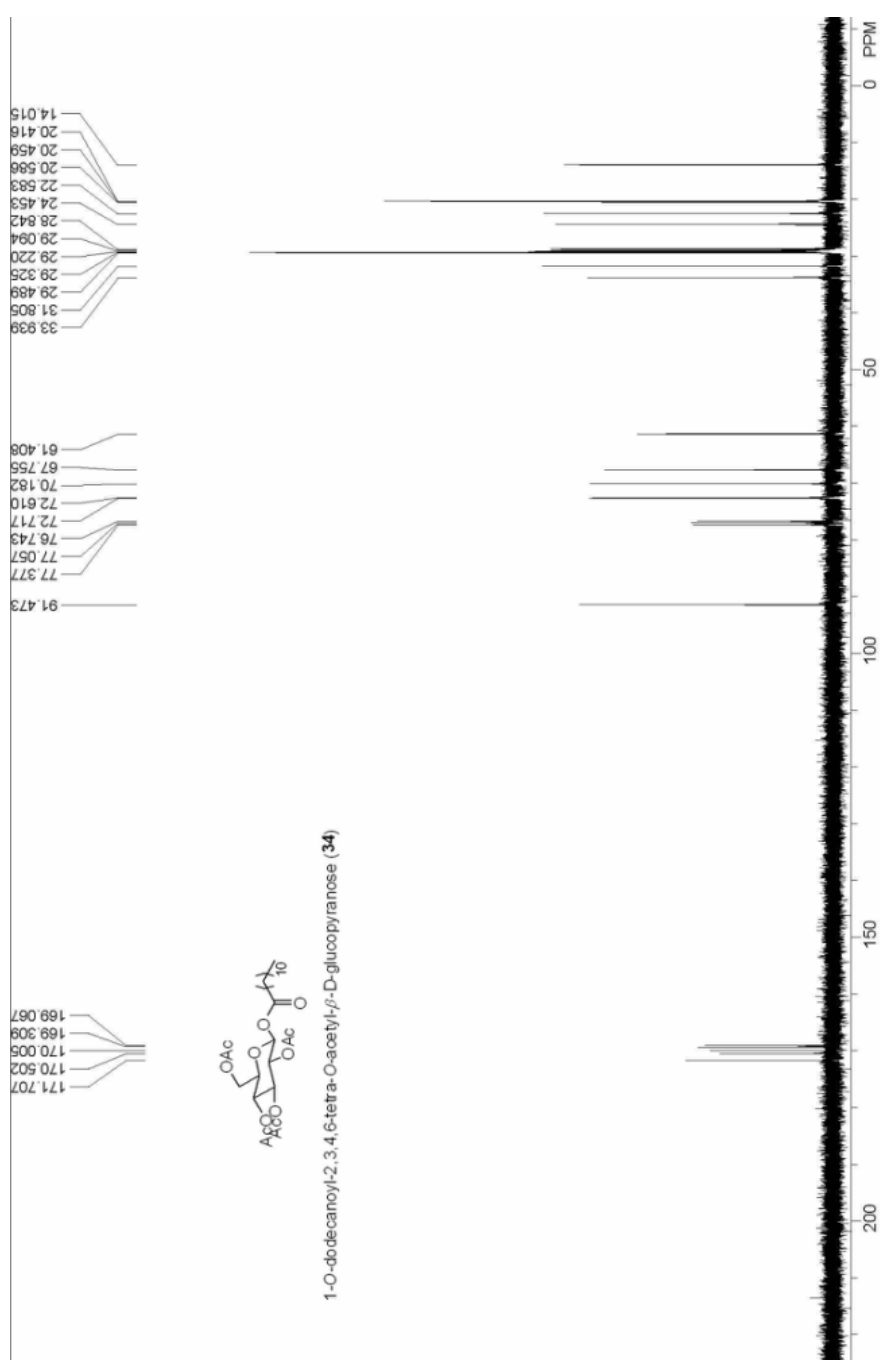

**Figure S32.**  $^{13}\text{C}$  NMR spectrum of compound **34**



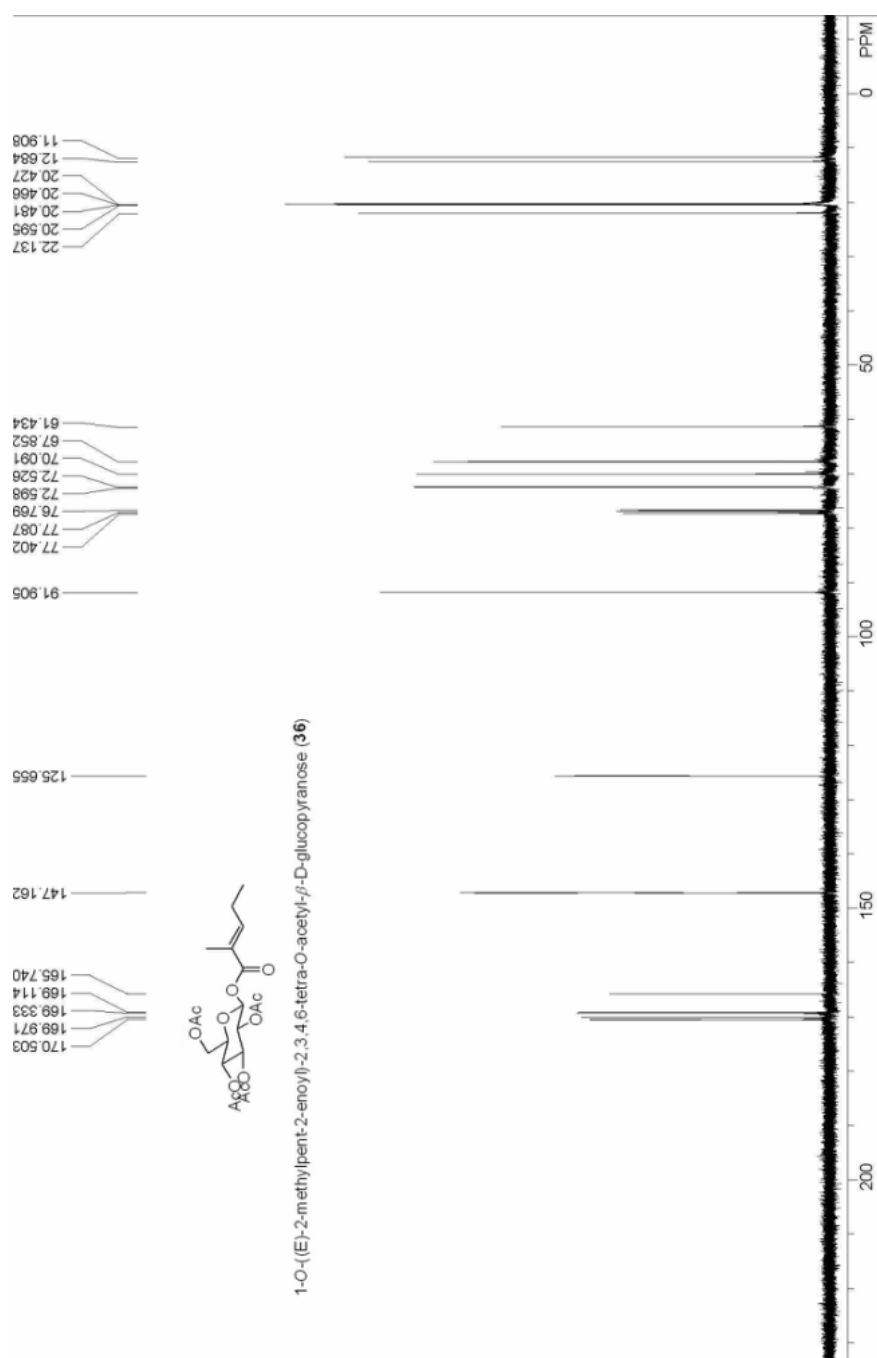

**Figure S34.**  $^{13}\text{C}$  NMR spectrum of compound **36**

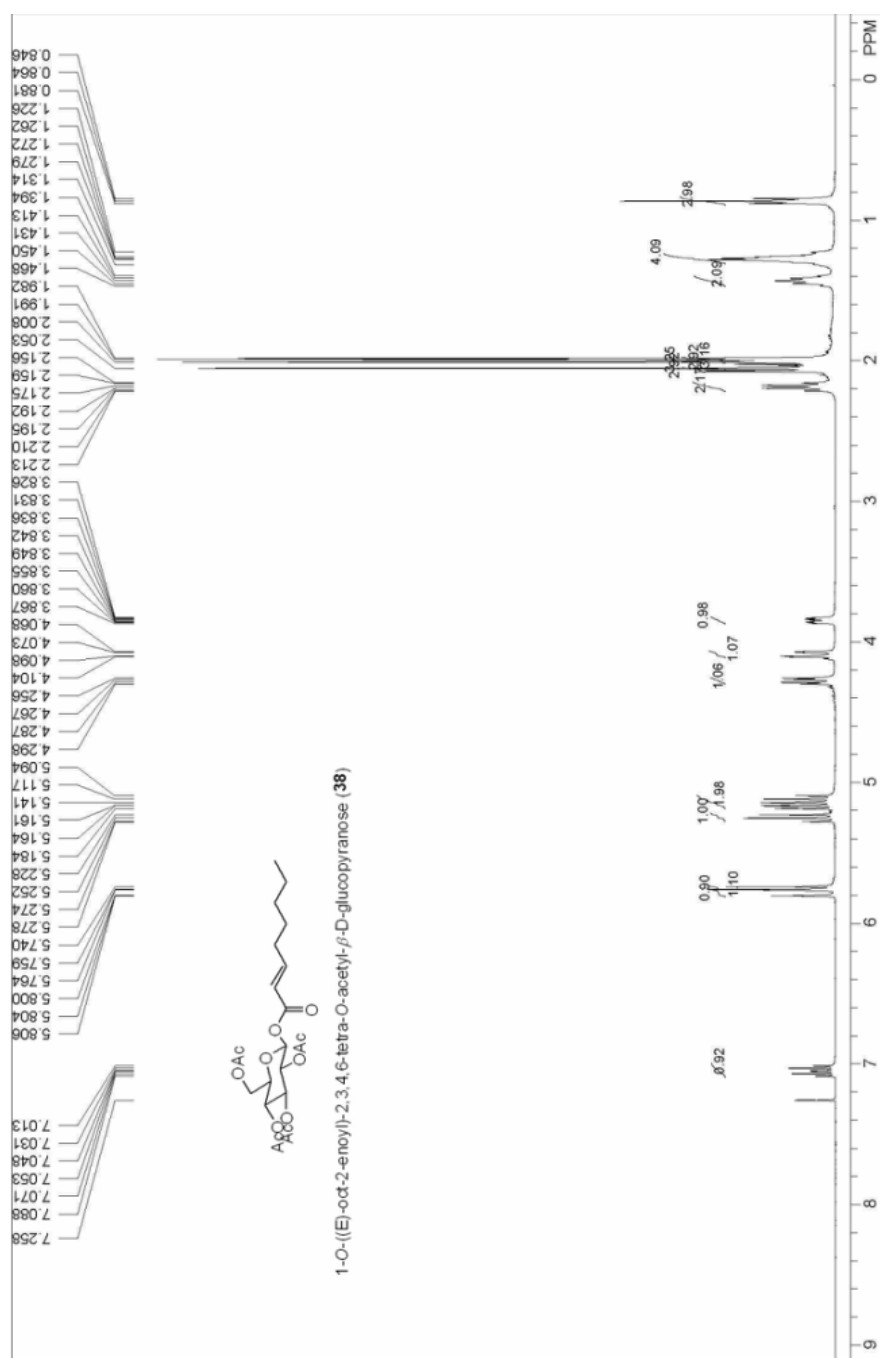

**Figure S35.** <sup>1</sup>H NMR spectrum of compound 38

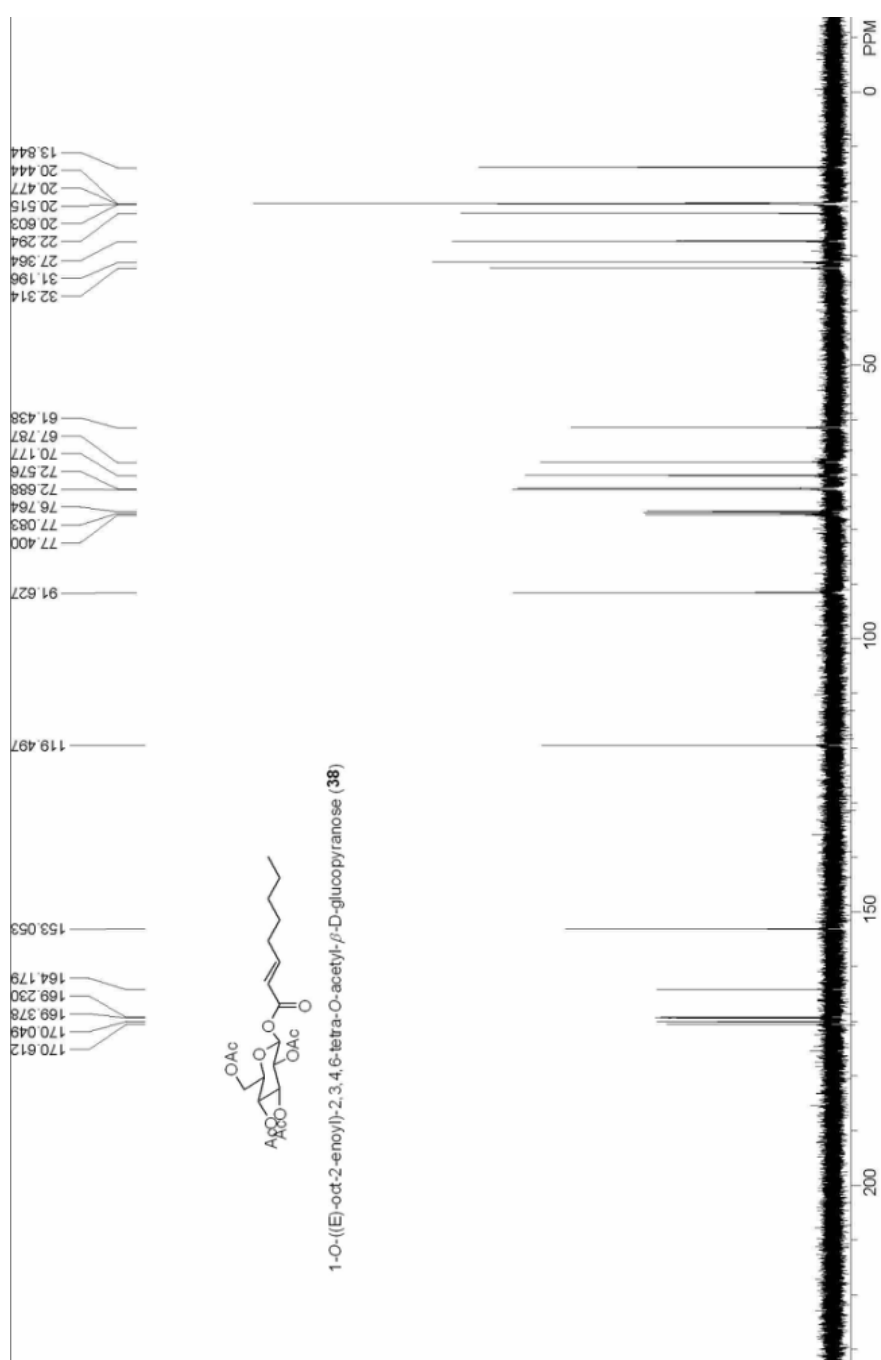

**Figure S36.** <sup>13</sup>C NMR spectrum of compound 38

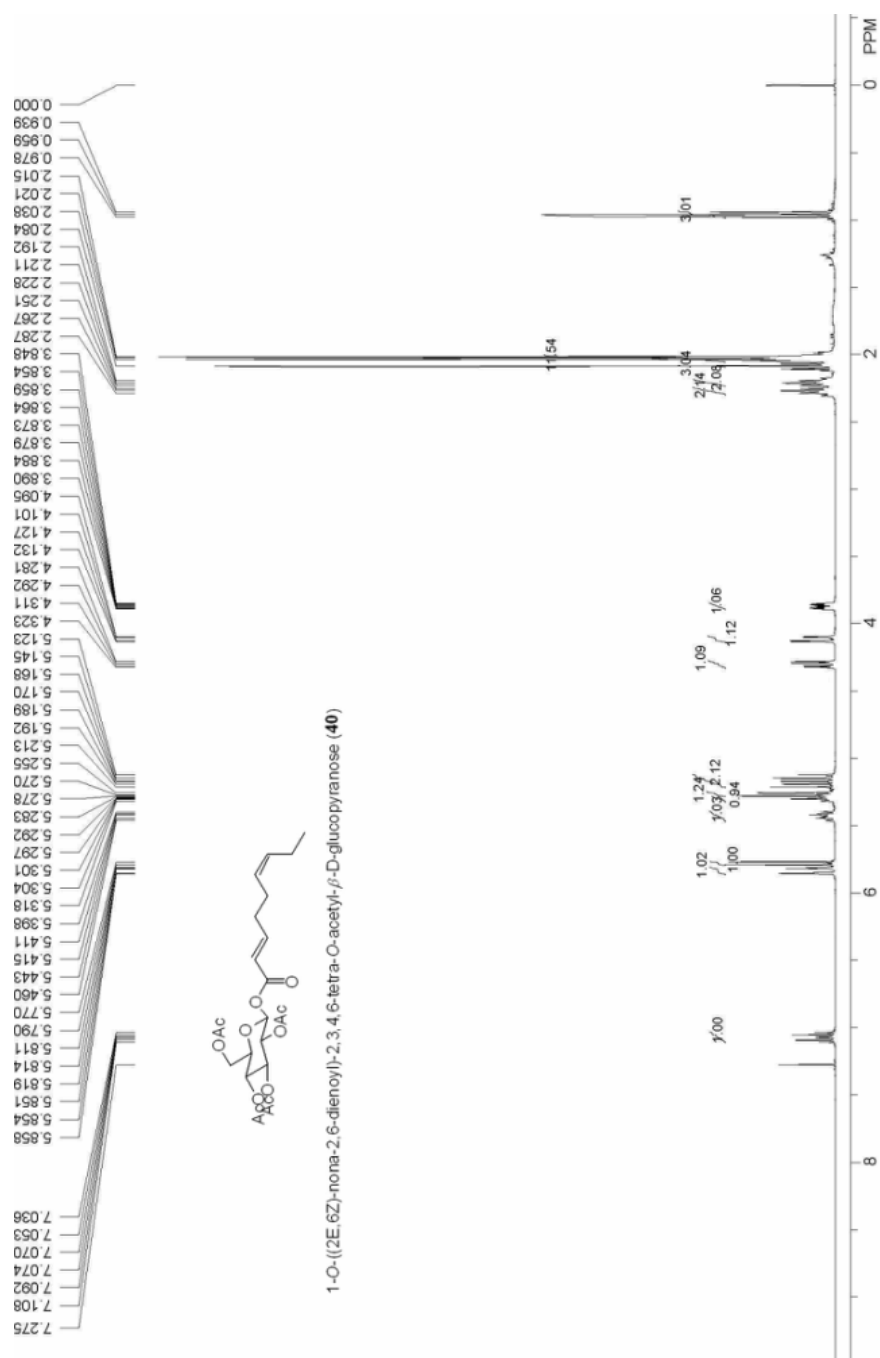

**Figure S37.** <sup>1</sup>H NMR spectrum of compound 40

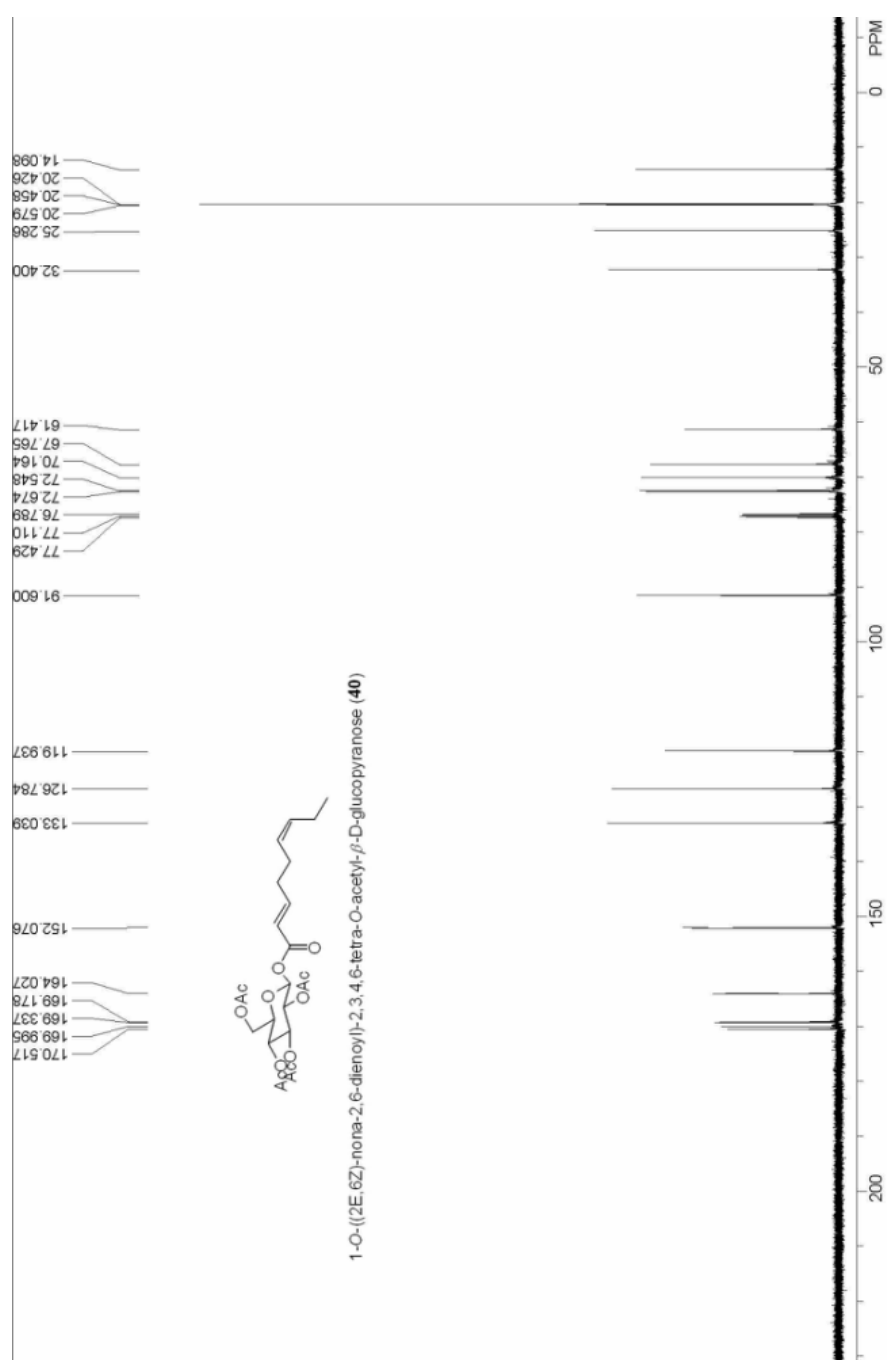

**Figure S38.** <sup>13</sup>C NMR spectrum of compound **40**

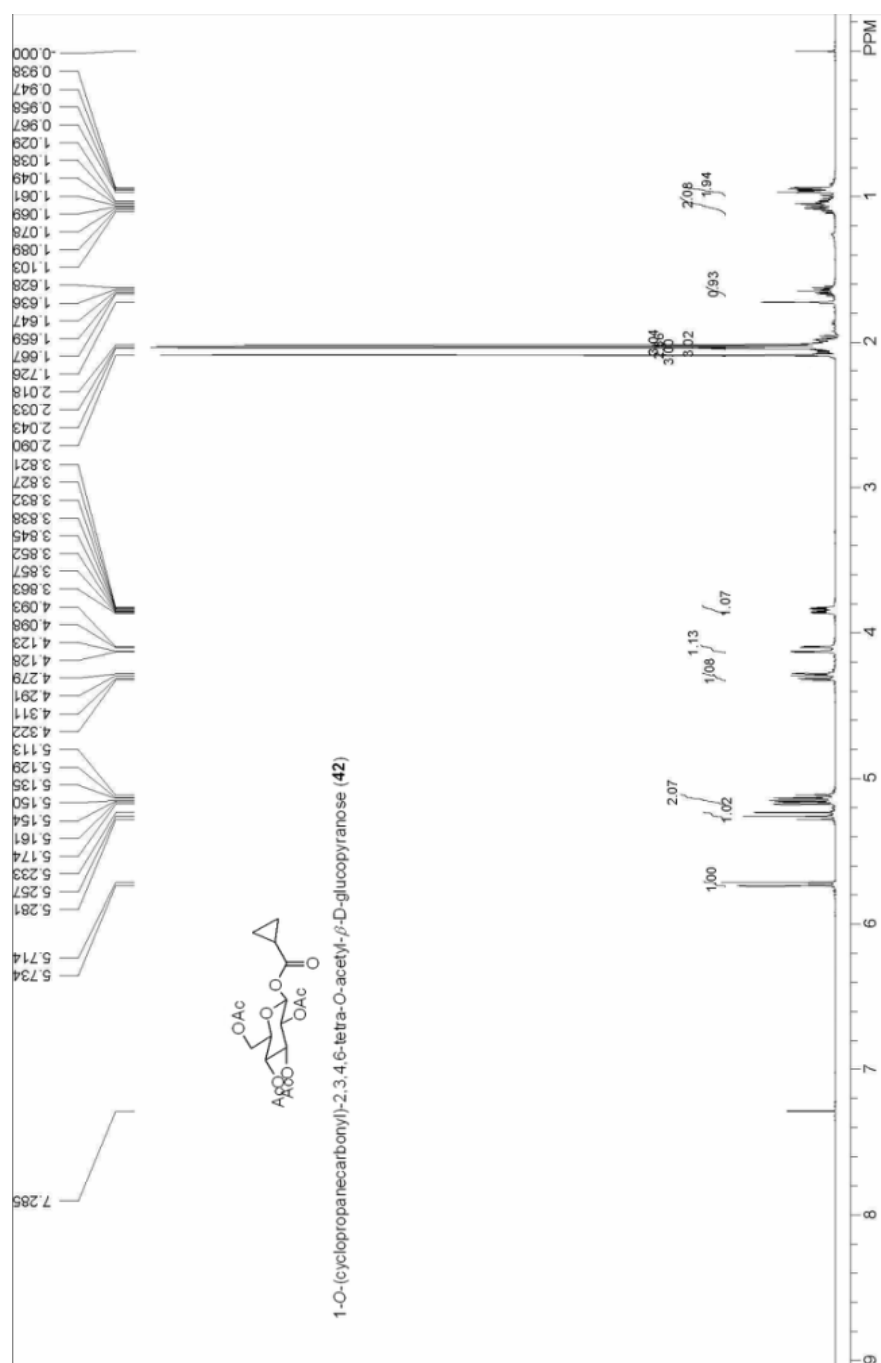

**Figure S39.** <sup>1</sup>H NMR spectrum of compound 42



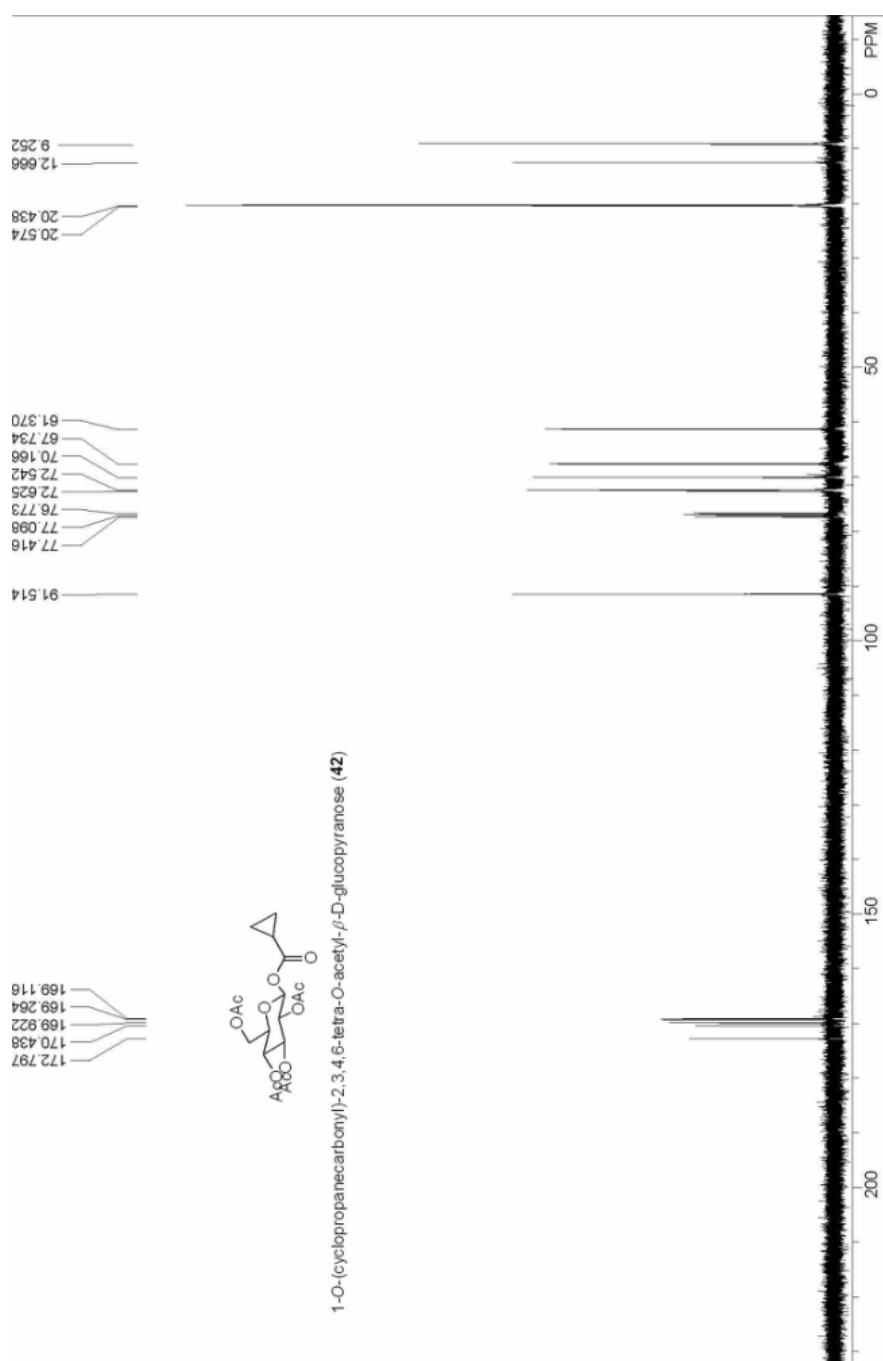

**Figure S40.** <sup>13</sup>C NMR spectrum of compound **42**

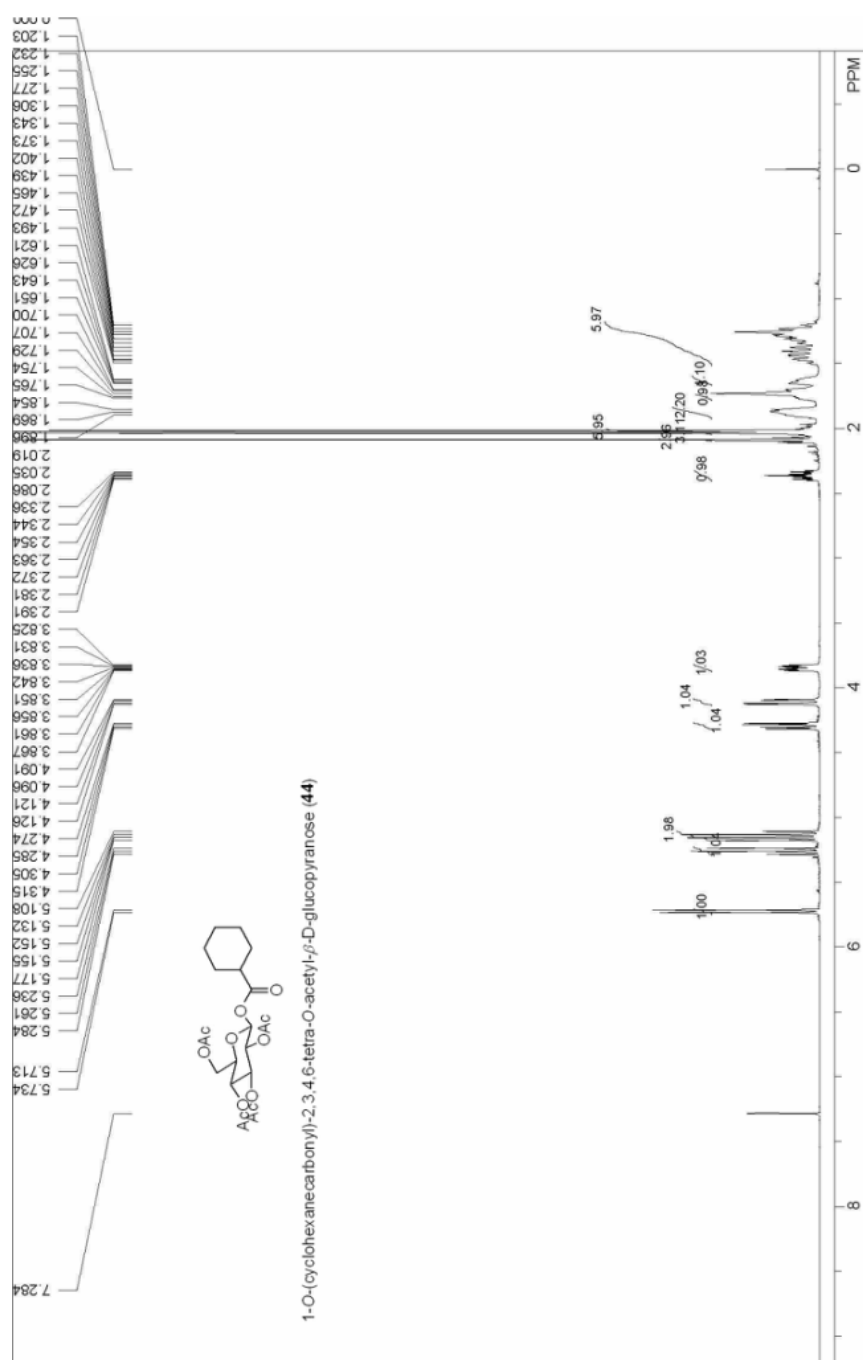

**Figure S41.** <sup>1</sup>H NMR spectrum of compound 44

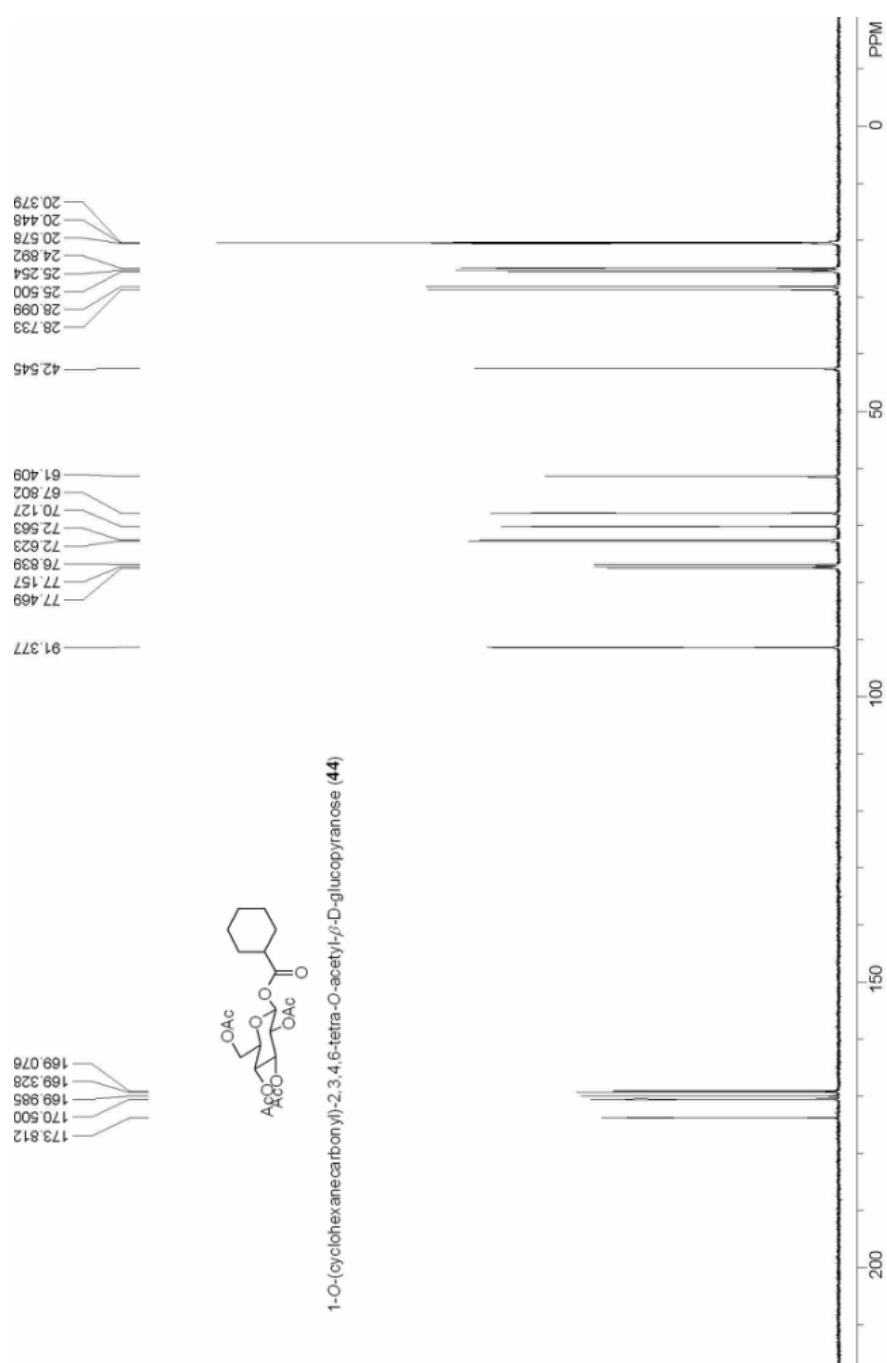

**Figure S42.**  $^{13}\text{C}$  NMR spectrum of compound **44**

# Copies of 2D NMR data of compound 8

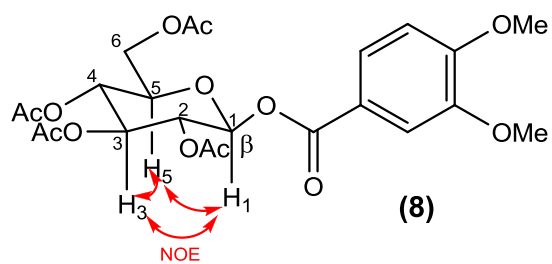

NOESY

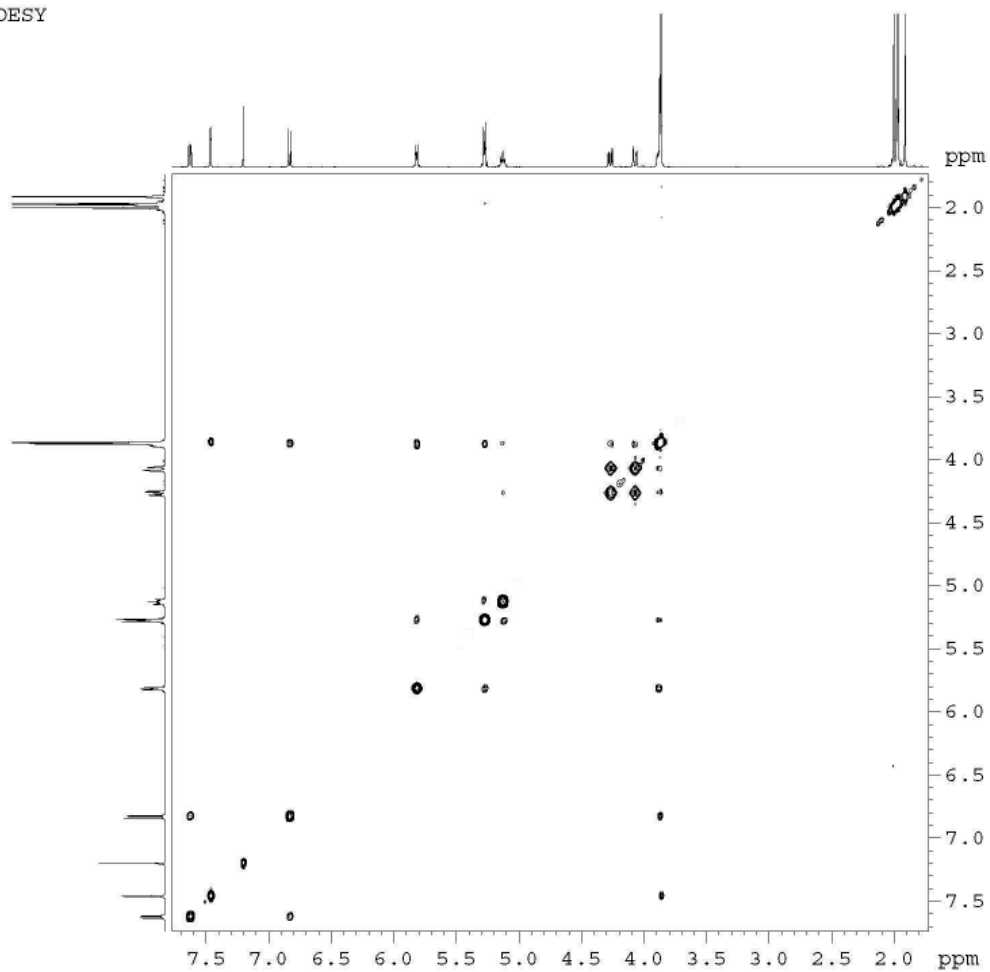

Figure S43. NOESY spectrum of compound 8

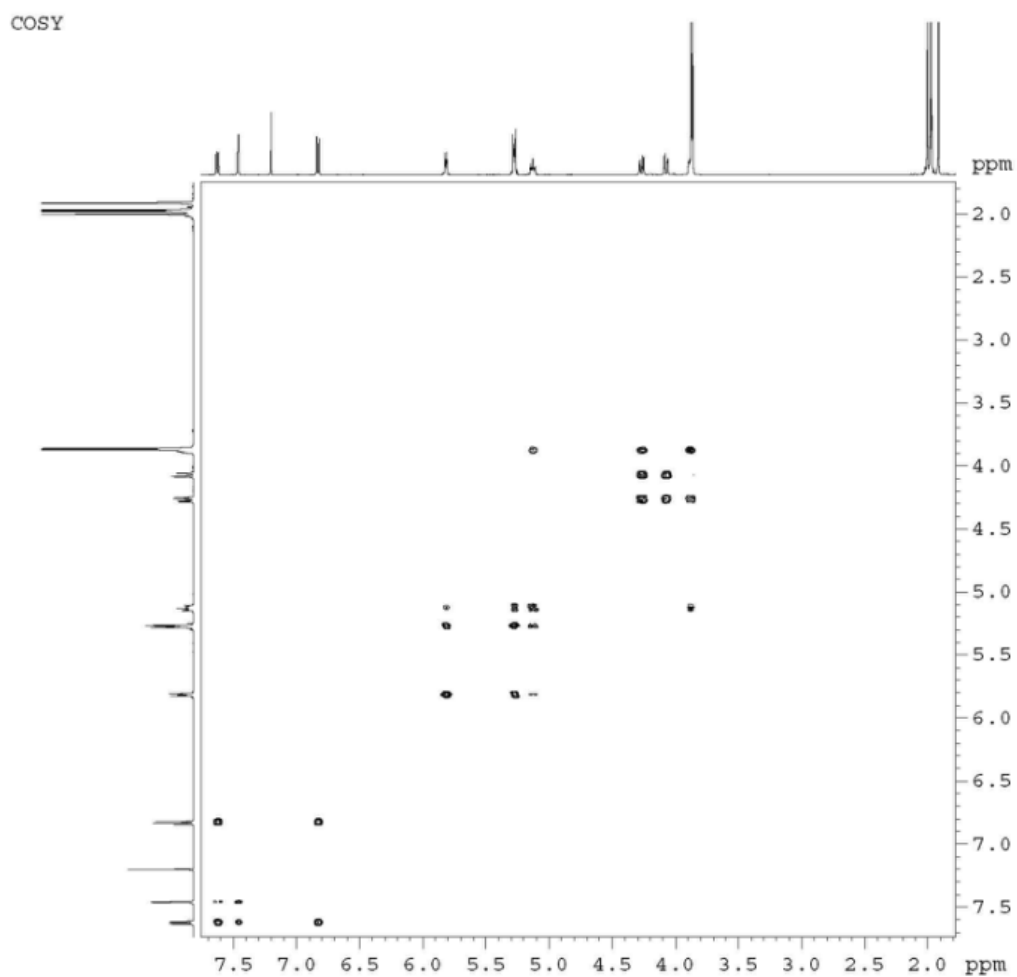

**Figure S44.**  $^1\text{H}$ - $^1\text{H}$  COSY spectrum of compound **8**

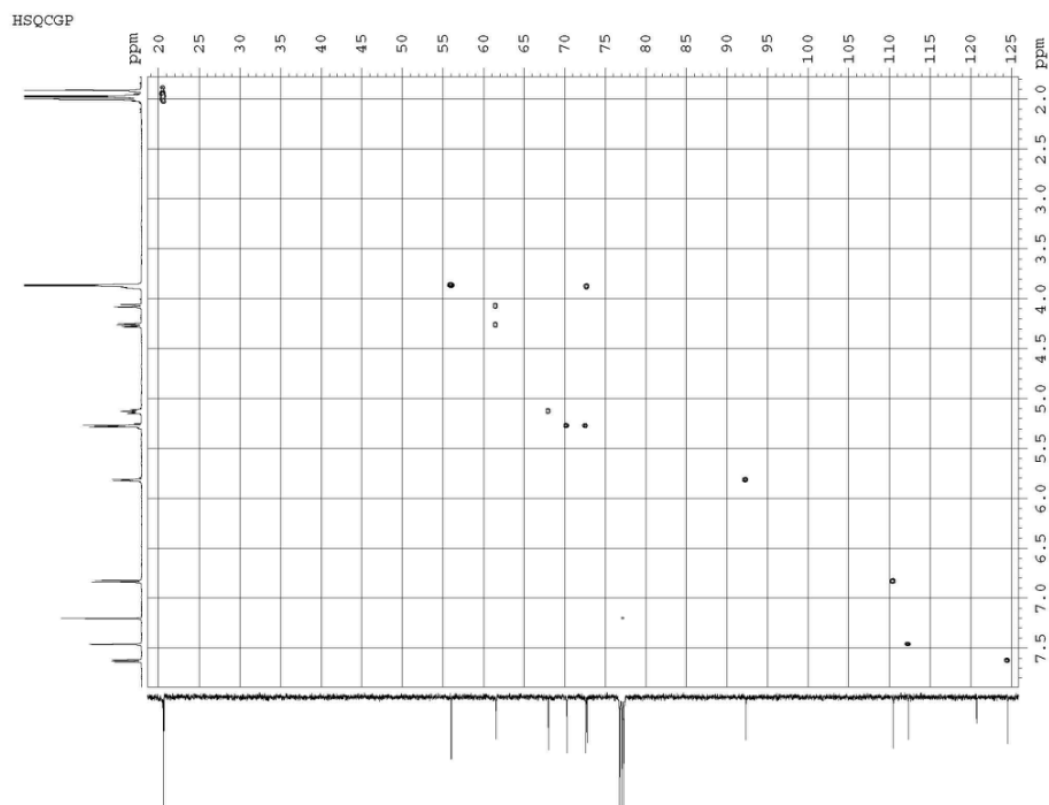

**Figure S45.** HSQC spectrum of compound **8**
